# Supplementary material for: Widespread bone-based fluorescence in chameleons
Source: PubMed Central journal article supplement (PMC5768862; doi:10.1038/s41598-017-19070-7), 2018-01-15
Supplement: 41598_2017_19070_MOESM1_ESM.pdf [file 41598_2017_19070_MOESM1_ESM.pdf]

Supplementary Information for

**Widespread bone-based fluorescence in chameleons**

David Prötzel<sup>1</sup>, Martin Heß<sup>2</sup>, Mark D. Scherz<sup>1</sup>, Martina Schwager<sup>3</sup>, Anouk van't Padje<sup>1,4</sup> & Frank Glaw<sup>1\*</sup>

<sup>1</sup>Department of Herpetology, Zoologische Staatssammlung München (ZSM-SNSB), Münchhausenstr. 21, 81247 München, Germany

<sup>2</sup>Department Biologie II, Ludwigs-Maximilians-Universität München, Großhaderner Straße 2, 82152 Planegg-Martinsried, Germany

<sup>3</sup>Department of Applied Sciences and Mechatronics, Munich University of Applied Sciences, Lothstr. 34, 80335 München, Germany

<sup>4</sup>Department of Ecological Science, Vrije Universiteit Amsterdam, De Boelelaan 1085, 1081 HV Amsterdam, The Netherlands

\*Corresponding author, e-mail: frank.glaw@zsm.mwn.de

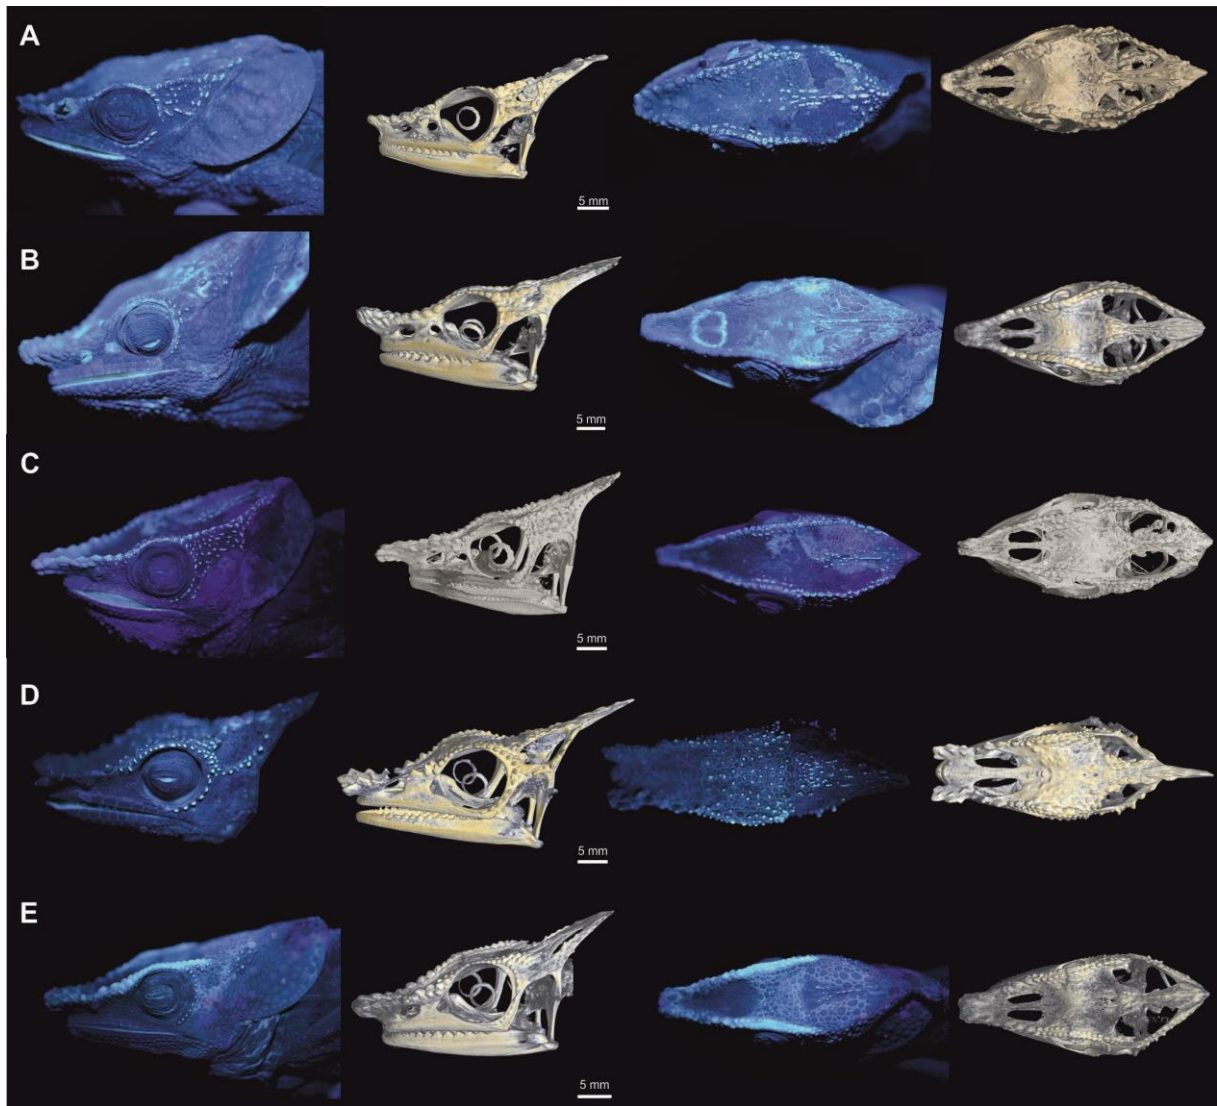

**Figure S1.** Fluorescence photographs and micro-CT scans of male specimens of the *Calumma brevicorne* group (A–C) and other species (D, E) in lateral and dorsal view. (A) *C. amber* ZSM 1041/2003. (B) *C. brevicorne* ZSM 549/2001. (C) *C. crypticum* ZSM 455/2010. (D) *C. cucullatum* ZSM 655/2014. (E) *C. malthe* ZSM 71/2005.

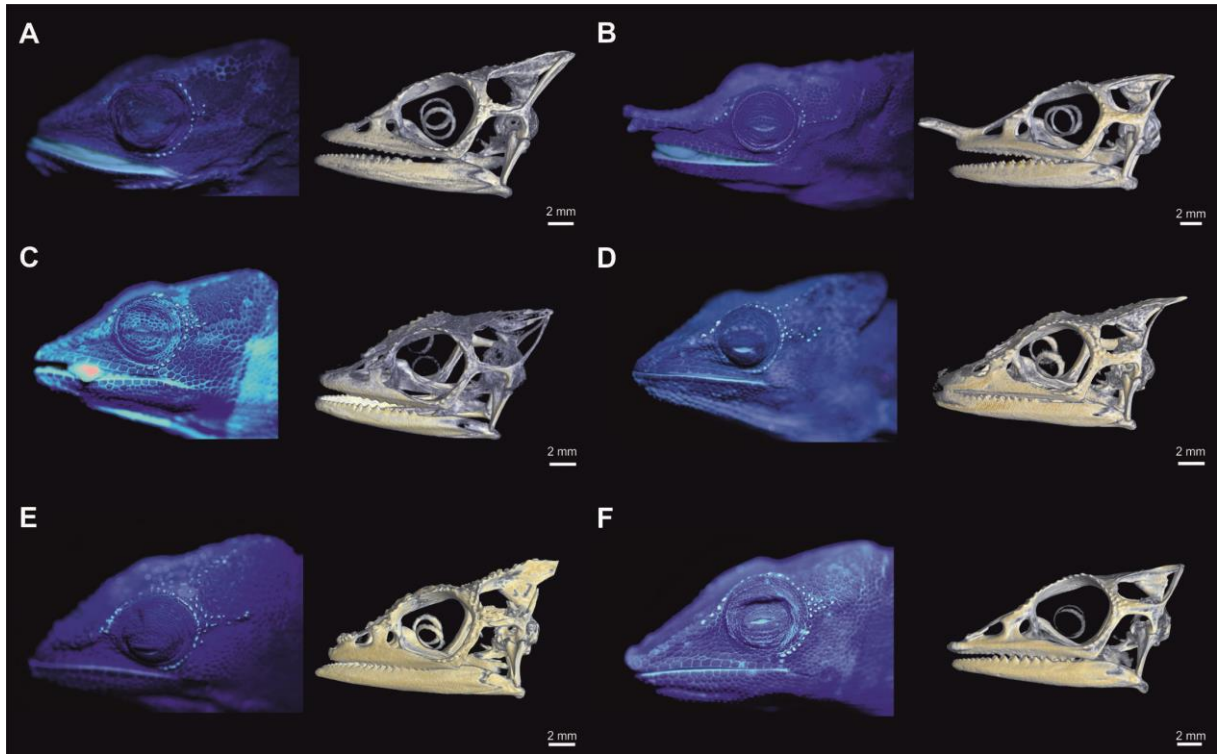

**Figure S2.** Fluorescence photographs and micro-CT scans of male specimens of the *Calumma furcifer* group in lateral view. (A) *C. andringitraense* ZSM 554/2001. (B) *C. furcifer* ZSM 225/2002. (C) *C. gastrontaenia* ZSM 226/2002. (D) *C. glawi* ZSM 2042/2008. (E) *C. guillaumeti* ZSM 440/2005. (F) *C. tarzan* ZSM 219/2010.

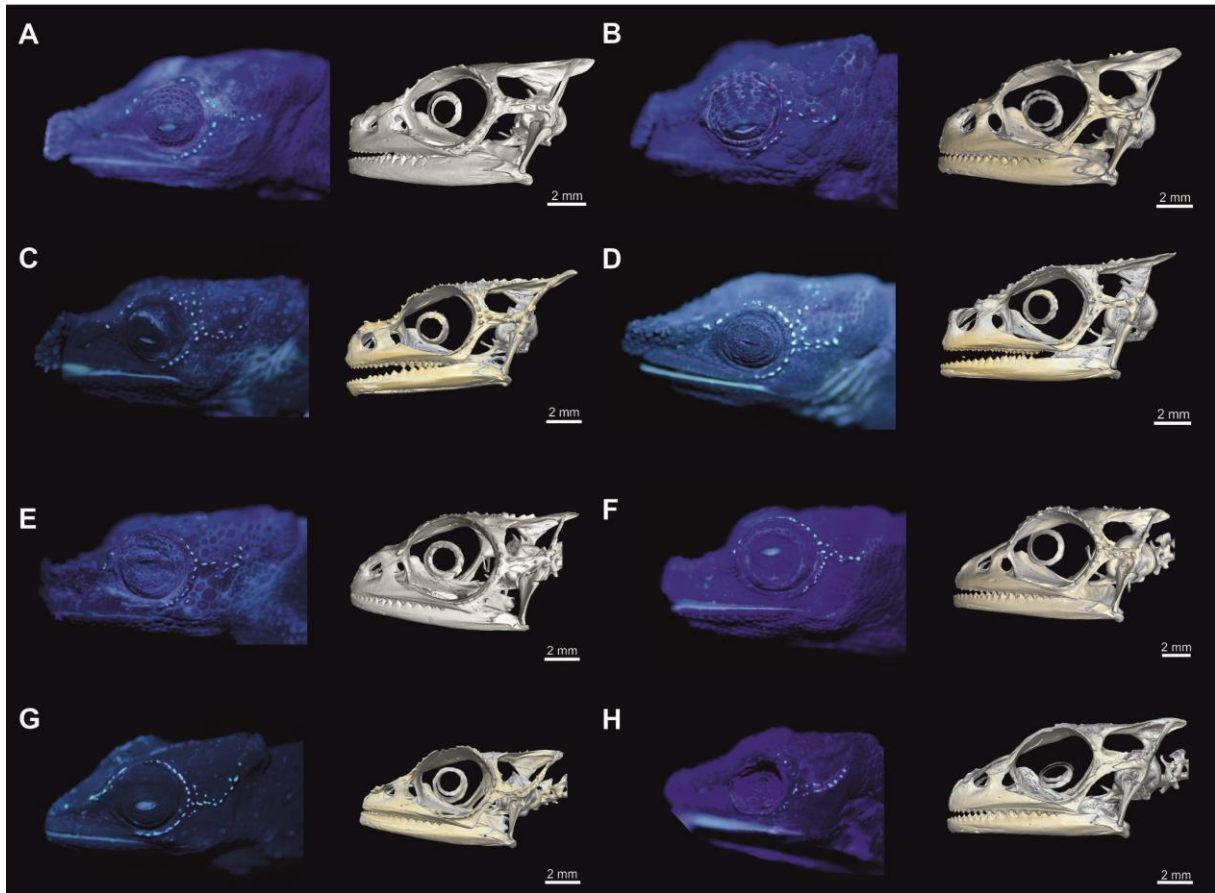

**Figure S3.** Fluorescence photographs and micro-CT scans of male specimens of *Calumma nasutum* group in lateral view. (A) *C. boettgeri* ZSM 440/2000. (B) *C. cf. fallax* ZSM 693/2009. (C) *C. gehringi* ZSM 2851/2010. (D) *C. linotum* ZSM 2072/2007. (E) *C. guibei* ZSM 2855/2010. (F) *C. nasutum* ZSM 618/2009. (G) *C. vatosoa* MRSN R1628. (H) *C. vohibola* ZSM 645/2009.

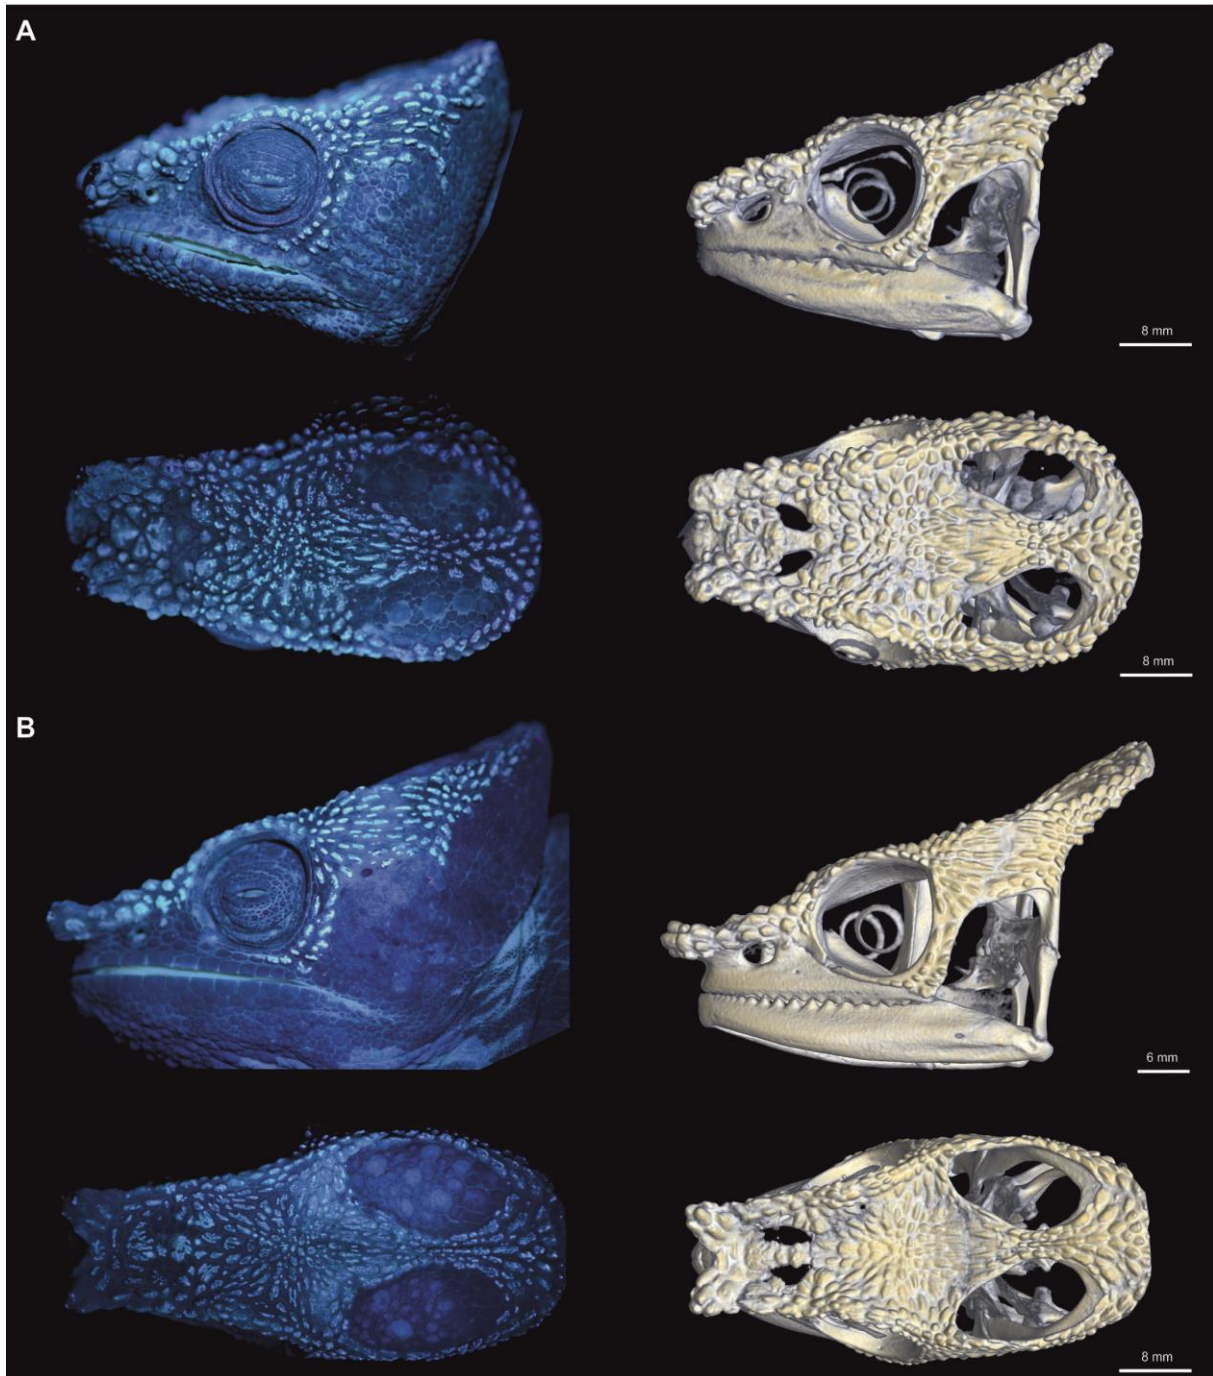

**Figure S4.** Fluorescent photographs and micro-CT scans of male specimens of *Calumma parsonii* group in lateral and dorsal view. (A) *C. ambreense* ZSM 1042/2003. (B) *C. oshaughnessyi* ZSM 1836/2010.

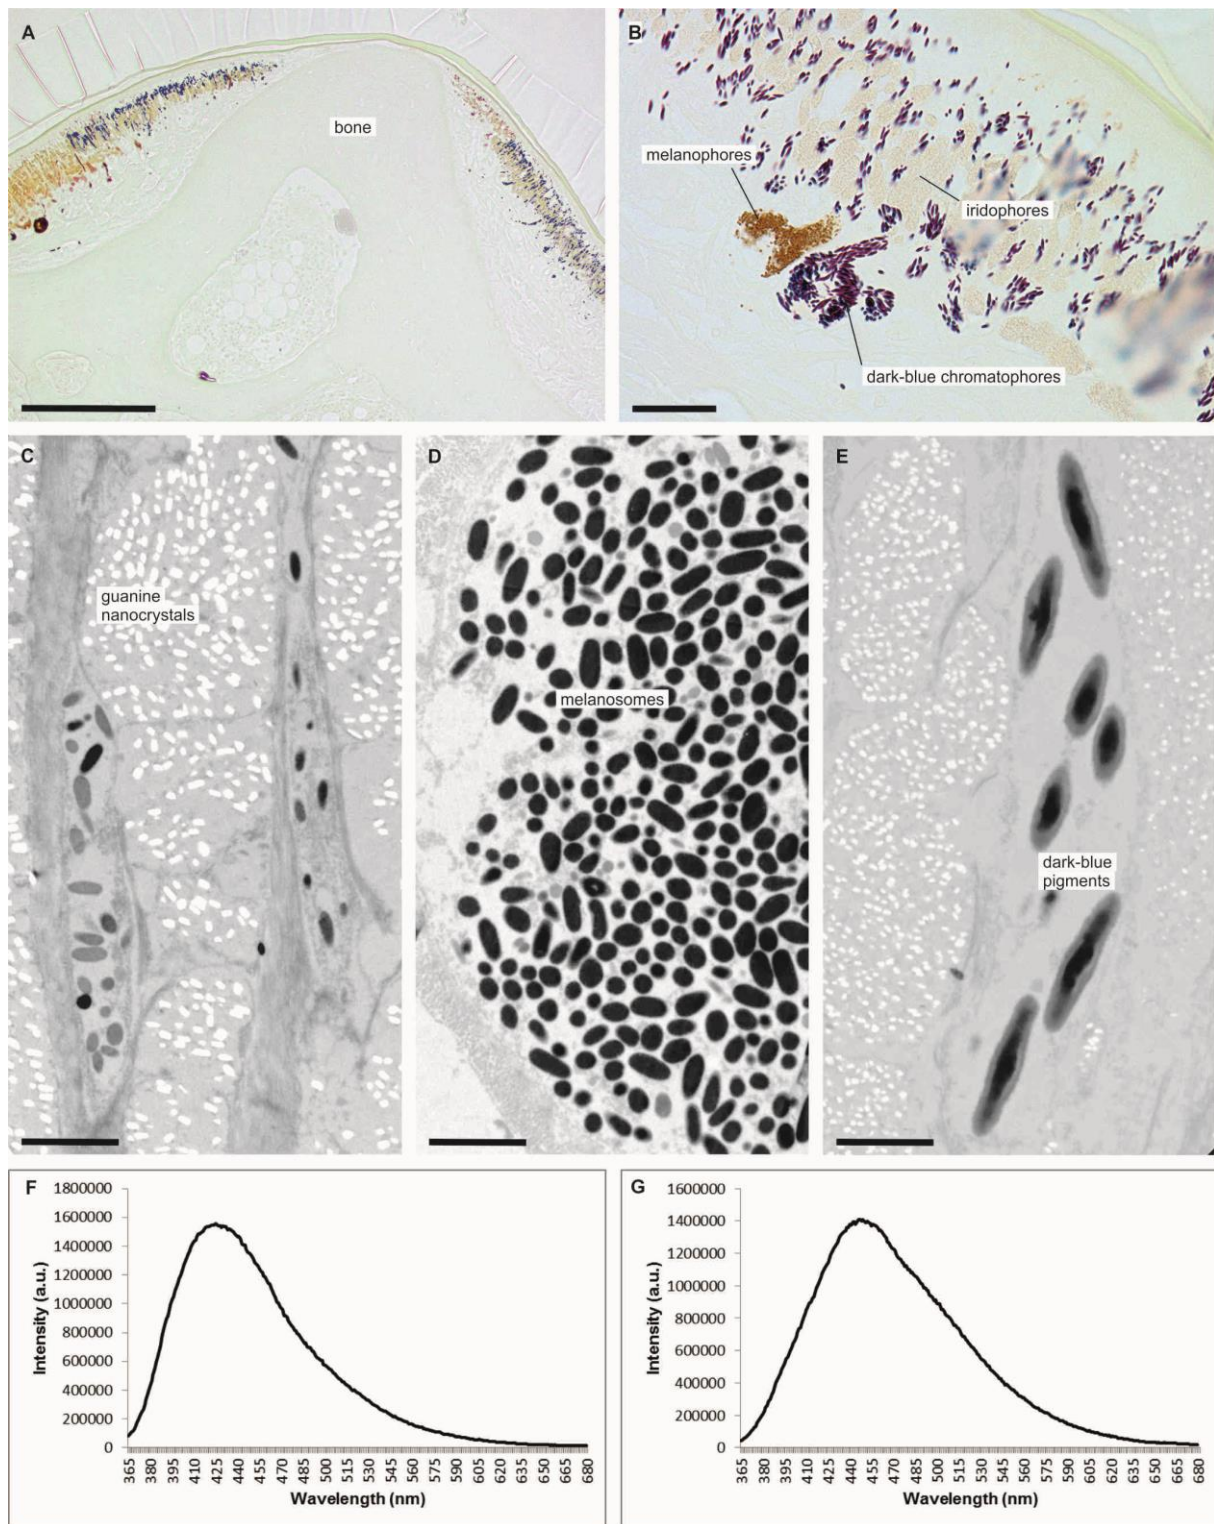

**Figure S5.** Chromatophores in the skin of a male *Calumma crypticum* (ZSM 503/2014) from the temporal region. (A) Semithin section (1.54  $\mu\text{m}$ ) of a FT, unstained, 10x. (B) Details of skin including 3 types of chromatophores in the dermis, unstained, 60x; (C–E) TEM photographs of the different chromatophores, shown in (B). (C) Guanine nanocrystals in iridophores. (D) Melanosomes in brown melanophores (up to 450 nm in diameter and 1  $\mu\text{m}$  in length, homogenous material). (E) Unknown pigments in dark-blue chromatophores; up to 750 nm in diameter and 3.2  $\mu\text{m}$  in length, electron dense core, less electron dense coat ca. 150 nm). (F) Fluorescence spectrum of FT on temporal region of *C. crypticum* (see above) with

emission peak at 425 nm. (G) Fluorescence spectrum of underlying bone on temporal region of the same specimen with emission peak at around 445 nm. Scale bars in (A) 200  $\mu\text{m}$ , in (B) 20  $\mu\text{m}$ , in (C–E) 2  $\mu\text{m}$ .

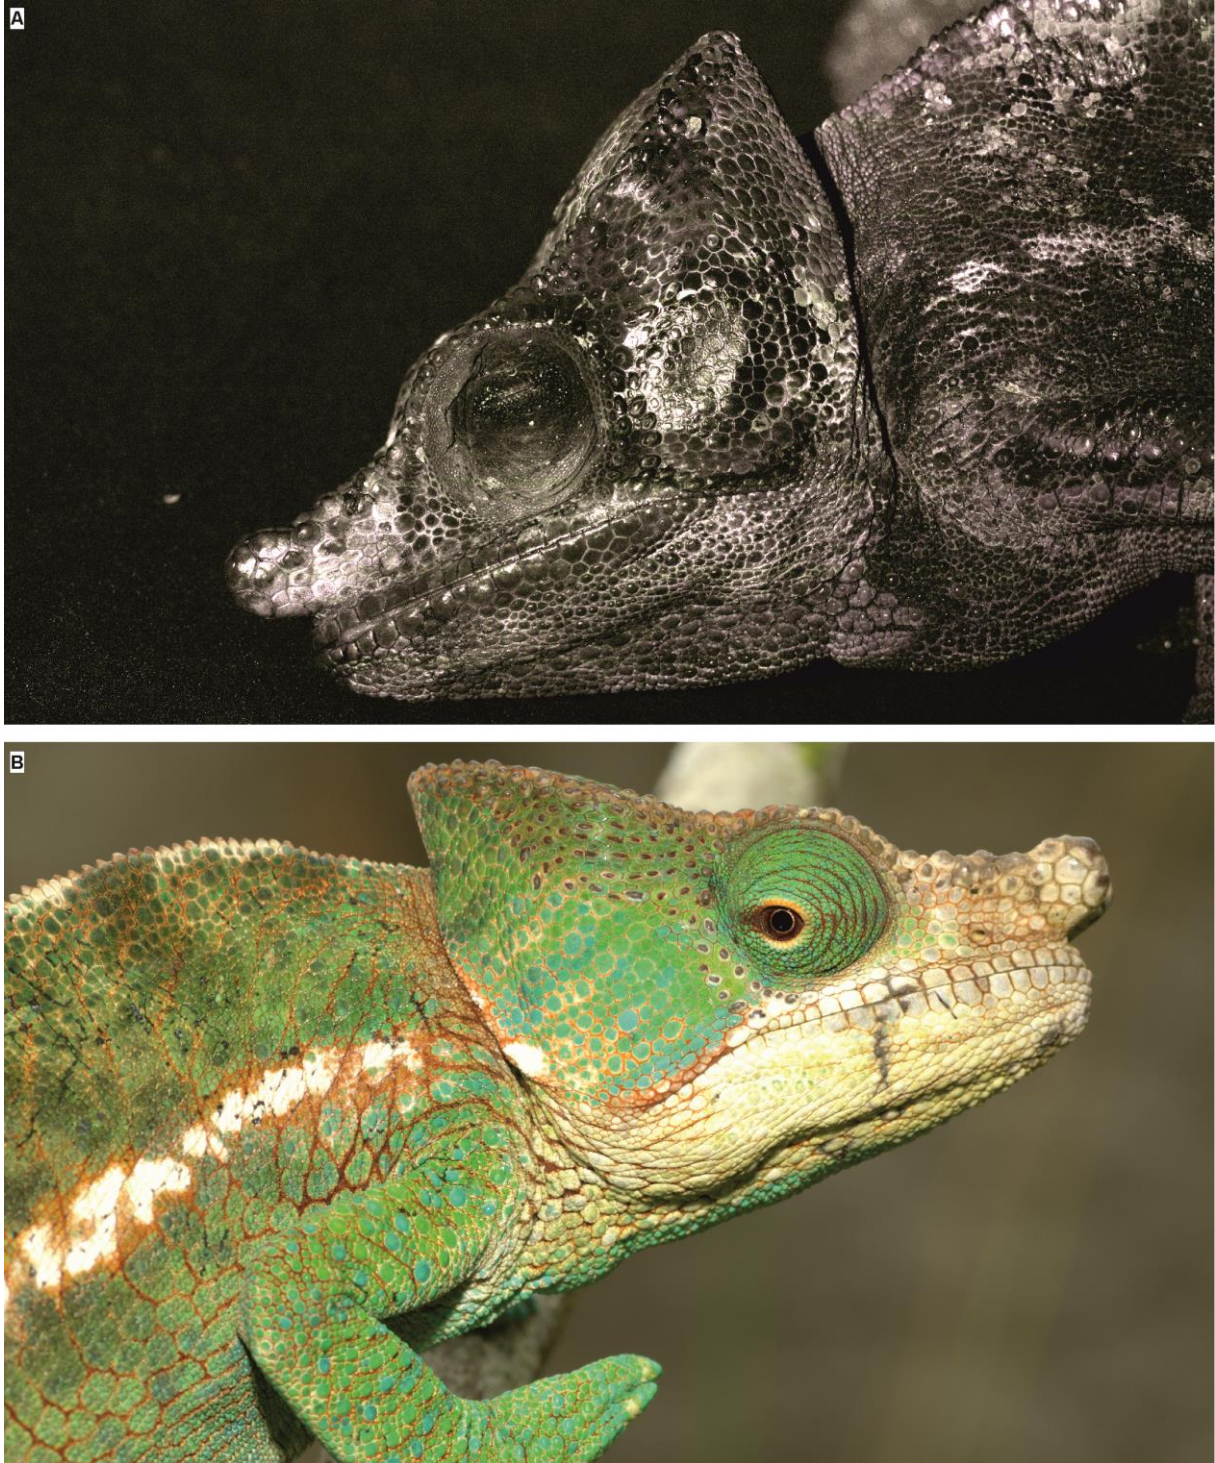

**Figure S6.** (A) UV photograph of *Calumma globifer*, male (ZSM 141/2016, only UV light at 365 nm, for details, see chapter UV photography; photograph taken by Roy Hessing). (B) Photograph of the same specimen under sunlight in the natural habitat.

**Table S1.** ANOVA results for species- and sex-specificity based on the total number of FTs per head side of 133 individuals/25 *Calumma* species assigned to four species groups. For graphical representation of the extent of sexual dimorphism see Fig. 3B. (Df, degrees of freedom; sq, square; *P*, Probability; Significance: ‘\*\*\*’ < 0.01, ‘\*’ < 0.05.

|                                                                                                              |           | <b>Df</b> | <b>Sum Sq</b> | <b>Mean Sq</b> | <b>F value</b> | <b>P</b> | <b>Significance</b> |
|--------------------------------------------------------------------------------------------------------------|-----------|-----------|---------------|----------------|----------------|----------|---------------------|
| <i>Calumma brevicorne</i> species group, response variable (n tubercles), ANOVA<br>anova(lm(tub~spec + sex)) | Species   | 5         | 3452.2        | 690.43         | 3.627          | 0.016036 | *                   |
|                                                                                                              | Sex       | 1         | 2758.3        | 2758.27        | 14.490         | 0.001031 | **                  |
|                                                                                                              | Residuals | 21        | 3997.6        | 190.36         |                |          |                     |
| <i>Calumma furcifer</i> species group, response variable (n tubercles), ANOVA<br>anova(lm(tub~spec + sex))   | Species   | 4         | 263.32        | 65.830         | 1.3737         | 0.2803   |                     |
|                                                                                                              | Sex       | 1         | 140.51        | 140.514        | 2.9321         | 0.1031   |                     |
|                                                                                                              | Residuals | 19        | 910.53        | 47.922         |                |          |                     |
| <i>Calumma nasutum</i> species group, response variable (n tubercles), ANOVA<br>anova(lm(tub~spec + sex))    | Species   | 7         | 1398.13       | 199.73         | 3.6115         | 0.002801 | **                  |
|                                                                                                              | Sex       | 1         | 529.94        | 529.94         | 9.5820         | 0.003066 | **                  |
|                                                                                                              | Residuals | 56        | 3097.09       | 55.31          |                |          |                     |
| <i>Calumma parsonii</i> species group, response variable (n tubercles), ANOVA<br>anova(lm(tub~spec + sex))   | Species   | 4         | 6462.3        | 1615.59        | 6.9377         | 0.0284   | *                   |
|                                                                                                              | Sex       | 1         | 0.9           | 0.94           | 0.0040         | 0.9518   |                     |
|                                                                                                              | Residuals | 5         | 1164.4        | 232.87         |                |          |                     |

**Table S2.** Sex and species specific fluorescent pattern of adult individuals (140 individuals, 29 species). Factor loadings of PC 1 to PC 3 complementary to Fig. 3C.

|                   | <b>PC 1</b> | <b>PC 2</b> | <b>PC 3</b> |
|-------------------|-------------|-------------|-------------|
| <b>RC</b>         | 0.087203    | 0.19697     | -0.017932   |
| <b>a</b>          | 0.10219     | 0.29573     | 0.095006    |
| <b>b</b>          | 0.058863    | 0.34484     | 0.27247     |
| <b>b-sr</b>       | -0.031373   | 0.11016     | 0.42523     |
| <b>c</b>          | 0.036192    | 0.37266     | 0.54059     |
| <b>c-sr</b>       | 0.095217    | 0.086056    | 0.0049441   |
| <b>d</b>          | 0.00067786  | -0.007235   | -0.0031641  |
| <b>LC</b>         | -0.076625   | 0.24938     | 0.17161     |
| <b>LC-sr</b>      | -0.019371   | 0.065071    | 0.25557     |
| <b>TC</b>         | 0.0021107   | 0.38367     | -0.33088    |
| <b>CC</b>         | 0.2678      | 0.57305     | -0.47357    |
| <b>TR</b>         | 0.94295     | -0.23313    | 0.12168     |
| <b>Eigenvalue</b> | 208.589     | 10.575      | 5.7124      |
| <b>% variance</b> | 87.938      | 4.4583      | 2.4083      |



**Table S3.** Number of fluorescent tubercles per bone of 25 adult males of different *Calumma* species. Factor loadings of PC 1 to PC 3 complementary to Fig. 3D.

|                   | PC 1      | PC 2       | PC 3      |
|-------------------|-----------|------------|-----------|
| <b>M</b>          | 0.072493  | -0.10216   | 0.41616   |
| <b>PRF</b>        | 0.19456   | 0.26981    | 0.85568   |
| <b>Flat</b>       | -0.019186 | -0.0059612 | -0.07562  |
| <b>POF</b>        | 0.60942   | 0.71193    | -0.29435  |
| <b>JU</b>         | 0.12935   | 0.025077   | 0.036106  |
| <b>SQ</b>         | 7.54E-01  | -6.40E-01  | -3.10E-02 |
| <b>Eigenvalue</b> | 315.87    | 18.7527    | 6.11386   |
| <b>% variance</b> | 90.758    | 5.3881     | 1.7567    |

**Table S4.** FTs per head side based on 12 characters of 140 individuals/29 *Calumma* species. See ‘Methods’ for abbreviations.

| species                                | collection number | sex | head side  | RC | CO |    |      |    |      | LC | LC-sr | TC | CC | TR | PC | DH |    |
|----------------------------------------|-------------------|-----|------------|----|----|----|------|----|------|----|-------|----|----|----|----|----|----|
|                                        |                   |     |            |    | a  | b  | b-sr | c  | c-sr |    |       |    |    |    |    |    | d  |
| <b><i>Calumma brevicorne</i> group</b> |                   |     |            |    |    |    |      |    |      |    |       |    |    |    |    |    |    |
| <i>Calumma amber</i>                   | ZSM 1040/2003     | m   | left side  | 5  | 4  | 6  | 0    | 12 | 7    | 0  | 4     | 0  | 5  | 10 | 8  | 8  | 20 |
|                                        |                   |     | right side | 5  | 4  | 7  | 0    | 7  | 3    | 0  | 5     | 0  | 6  | 8  | 7  | 0  | 0  |
| <i>Calumma amber</i>                   | ZSM 1041/2003     | m   | left side  | 2  | 3  | 5  | 0    | 4  | 0    | 0  | 4     | 0  | 5  | 7  | 9  | 5  | 15 |
|                                        |                   |     | right side | 3  | 3  | 4  | 0    | 5  | 0    | 0  | 4     | 0  | 4  | 7  | 5  | 0  | 0  |
| <i>Calumma amber</i>                   | ZSM 261/2004      | f   | left side  | 0  | 0  | 2  | 0    | 3  | 0    | 0  | 3     | 0  | 0  | 0  | 0  | 0  | 0  |
|                                        |                   |     | right side | 0  | 0  | -  | 0    | -  | 0    | 0  | -     | 0  | 0  | 0  | 0  | 0  | 0  |
| <i>Calumma amber</i>                   | ZSM 260/2004      | f   | left side  | 0  | 0  | 4  | 0    | 3  | 0    | 0  | 4     | 0  | 3  | 0  | 0  | 0  | 0  |
|                                        |                   |     | right side | 0  | 0  | 4  | 0    | 3  | 0    | 0  | 2     | 0  | 2  | 0  | 0  | 0  | 0  |
| <i>Calumma brevicorne</i>              | ZSM 30/2016       | m   | left side  | 2  | 4  | 6  | 0    | 6  | 0    | 0  | 5     | 0  | 4  | 10 | 7  | 6  | 20 |
|                                        |                   |     | right side | 2  | 4  | 7  | 0    | 8  | 0    | 0  | 4     | 0  | 5  | 10 | 8  | 0  | 0  |
| <i>Calumma brevicorne</i>              | ZSM 549/2001      | m   | left side  | 0  | 0  | 0  | 0    | 0  | 0    | 0  | 0     | 0  | 0  | 0  | 0  | 0  | 0  |
|                                        |                   |     | right side | 0  | 0  | 0  | 0    | 0  | 0    | 0  | 0     | 0  | 0  | 0  | 0  | 0  | 0  |
| <i>Calumma brevicorne</i>              | ZSM 1043/2003     | m   | left side  | 2  | 3  | 7  | 0    | 7  | 0    | 0  | 4     | 0  | 5  | 11 | 15 | 10 | 20 |
|                                        |                   |     | right side | 2  | 4  | 6  | 0    | 8  | 0    | 0  | 4     | 0  | 5  | 12 | 15 | 0  | 0  |
| <i>Calumma brevicorne</i>              | ZSM 549/2001      | m   | left side  | 1  | 3  | 6  | 0    | 5  | 0    | 0  | 4     | 0  | 6  | 4  | 5  | 7  | 10 |
|                                        |                   |     | right side | 1  | 3  | 6  | 0    | 9  | 0    | 0  | 5     | 0  | 4  | 4  | 6  | 0  | 0  |
| <i>Calumma brevicorne</i>              | ZSM 31/2016       | f   | left side  | 2  | 1  | 8  | 0    | 5  | 0    | 0  | 4     | 0  | 6  | 5  | 8  | 6  | 10 |
|                                        |                   |     | right side | 2  | 3  | 8  | 0    | 5  | 0    | 0  | 4     | 0  | 5  | 7  | 11 | 0  | 0  |
| <i>Calumma brevicorne</i>              | ZSM 802/2003      | f   | left side  | 0  | 0  | 0  | 0    | 0  | 0    | 0  | 0     | 0  | 0  | 0  | 0  | 0  | 0  |
|                                        |                   |     | right side | 0  | 0  | 0  | 0    | 0  | 0    | 0  | 0     | 0  | 0  | 0  | 0  | 0  | 0  |
| <i>Calumma brevicorne</i>              | ZSM 1684/2012     | f   | left side  | 2  | 2  | 6  | 0    | 7  | 0    | 0  | 4     | 0  | 6  | 7  | 10 | 5  | 15 |
|                                        |                   |     | right side | 2  | 2  | 6  | 0    | 8  | 0    | 0  | 4     | 0  | 5  | 5  | 10 | 0  | 0  |
| <i>Calumma crypticum</i>               | ZSM 32/2016       | m   | left side  | 4  | 5  | 8  | 0    | 7  | 0    | 0  | 3     | 0  | 5  | 7  | 5  | 7  | 15 |
|                                        |                   |     | right side | 3  | 5  | 11 | 0    | 7  | 0    | 0  | 4     | 0  | 4  | 8  | 10 | 0  | 0  |
| <i>Calumma crypticum</i>               | ZSM 135/2016      | m   | left side  | 8  | 6  | 6  | 0    | 7  | 6    | 0  | 5     | 0  | 4  | 11 | 10 | 10 | 30 |
|                                        |                   |     | right side | 6  | 5  | 7  | 0    | 9  | 7    | 0  | 4     | 0  | 4  | 14 | 9  | 0  | 0  |

|                            |                        |    |            |   |   |   |   |   |   |   |   |   |   |    |    |   |    |
|----------------------------|------------------------|----|------------|---|---|---|---|---|---|---|---|---|---|----|----|---|----|
| <i>Calumma crypticum</i>   | ZSM 1022/2003<br>1044? | m  | left side  | 1 | 3 | 6 | 0 | 5 | 0 | 0 | 5 | 0 | 6 | 8  | 13 | 7 | 15 |
|                            |                        |    | right side | 0 | 5 | 5 | 0 | 7 | 0 | 0 | 5 | 0 | 7 | 10 | 14 | 0 | 0  |
| <i>Calumma crypticum</i>   | ZSM 68/2005            | m  | left side  | 0 | 0 | 3 | 0 | 2 | 0 | 0 | 3 | 0 | 2 | 0  | 0  | 3 | 4  |
|                            |                        |    | right side | 0 | 0 | 3 | 0 | 2 | 0 | 0 | 3 | 0 | 2 | 0  | 0  | 0 | 0  |
| <i>Calumma crypticum</i>   | ZSM 455/2010           | m  | left side  | 3 | 6 | 6 | 0 | 6 | 5 | 0 | 3 | 0 | 5 | 12 | 15 | 5 | 20 |
|                            |                        |    | right side | 3 | 5 | 7 | 0 | 8 | 0 | 0 | 5 | 0 | 7 | 12 | 17 | 0 | 0  |
| <i>Calumma crypticum</i>   | ZSM 1711/2010          | m  | left side  | 1 | 6 | 6 | 0 | 7 | 2 | 0 | 5 | 0 | 5 | 9  | 8  | 4 | 30 |
|                            |                        |    | right side | 2 | 5 | 7 | 0 | 4 | 0 | 0 | 5 | 0 | 4 | 10 | 7  | 0 | 0  |
| <i>Calumma crypticum</i>   | ZSM 1712/2010          | m  | left side  | 2 | 5 | 7 | 0 | 7 | 4 | 0 | 5 | 0 | 4 | 11 | 10 | 9 | 40 |
|                            |                        |    | right side | 3 | 3 | 5 | 0 | 7 | 3 | 0 | 6 | 0 | 5 | 10 | 8  | 0 | 0  |
| <i>Calumma crypticum</i>   | ZSM 1713/2010          | m  | left side  | 3 | 4 | 6 | 0 | 6 | 3 | 0 | 6 | 0 | 5 | 10 | 12 | 7 | 40 |
|                            |                        |    | right side | 3 | 5 | 8 | 0 | 8 | 2 | 0 | 7 | 0 | 4 | 12 | 11 | 0 | 0  |
| <i>Calumma crypticum</i>   | ZSM 503/2014           | m  | left side  | 2 | 3 | 8 | 0 | 7 | 0 | 0 | 5 | 0 | 6 | 2  | 0  | 5 | 20 |
|                            |                        |    | right side | 2 | 3 | 7 | 0 | 8 | 0 | 0 | 4 | 0 | 6 | 4  | 0  | 0 | 0  |
| <i>Calumma crypticum</i>   | ZSM 502/2014           | jm | left side  | 0 | 0 | 3 | 0 | 6 | 0 | 0 | 5 | 0 | 4 | 0  | 7  | 4 | 4  |
|                            |                        |    | right side | 0 | 0 | 4 | 0 | 6 | 0 | 0 | 4 | 0 | 5 | 0  | 1  | 0 | 0  |
| <i>Calumma crypticum</i>   | ZSM 1723/2010          | jm | left side  | 0 | 0 | 3 | 0 | 4 | 0 | 0 | 4 | 0 | 3 | 0  | 0  | 6 | 10 |
|                            |                        |    | right side | 0 | 0 | 3 | 0 | 5 | 0 | 0 | 4 | 0 | 3 | 0  | 3  | 0 | 0  |
| <i>Calumma crypticum</i>   | ZSM 67/2005            | f  | left side  | 0 | 5 | 0 | 0 | 0 | 0 | 0 | 3 | 0 | 1 | 0  | 0  | 0 | 4  |
|                            |                        |    | right side | 0 | 5 | 0 | 0 | 0 | 0 | 0 | 1 | 0 | 0 | 0  | 0  | 0 | 0  |
| <i>Calumma crypticum</i>   | ZSM 133/2005           | f  | left side  | 0 | 0 | 4 | 0 | 3 | 0 | 0 | 0 | 0 | 0 | 0  | 0  | 0 | 0  |
|                            |                        |    | right side | 0 | 0 | 3 | 0 | 4 | 0 | 0 | 3 | 0 | 1 | 0  | 0  | 0 | 0  |
| <i>Calumma crypticum</i>   | ZSM 504/2014           | jf | left side  | 2 | 5 | 7 | 0 | 8 | 0 | 0 | 5 | 0 | 6 | 7  | 5  | 7 | 15 |
|                            |                        |    | right side | 3 | 4 | 7 | 0 | 7 | 0 | 0 | 5 | 0 | 5 | 7  | 3  | 0 | 0  |
| <i>Calumma crypticum</i>   | ZSM 617/2009           | m  | left side  | 3 | 6 | 7 | 0 | 3 | 0 | 0 | 4 | 0 | 4 | 13 | 4  | 8 | 15 |
|                            |                        |    | right side | 3 | 5 | 8 | 0 | 8 | 1 | 0 | 5 | 0 | 4 | 11 | 3  | 0 | 0  |
| <i>Calumma hafahafa</i>    | ZSM 511/2014           | f  | left side  | 0 | 6 | 6 | 0 | 7 | 0 | 0 | 4 | 0 | 7 | 3  | 7  | 8 | 20 |
|                            |                        |    | right side | 0 | 7 | 7 | 0 | 7 | 0 | 0 | 3 | 0 | 5 | 3  | 6  | 0 | 0  |
| <i>Calumma hilleniusi</i>  | ZSM 315/2006           | m  | left side  | 0 | 0 | 0 | 0 | 0 | 0 | 0 | 0 | 0 | 0 | 0  | 0  | 0 | 0  |
|                            |                        |    | right side | 0 | 0 | 0 | 0 | 0 | 0 | 0 | 0 | 0 | 0 | 0  | 0  | 0 | 0  |
| <i>Calumma hilleniusi</i>  | ZSM 380/2000           | m  | left side  | 0 | 0 | 0 | 0 | 0 | 0 | 0 | 0 | 0 | 0 | 0  | 0  | 0 | 0  |
|                            |                        |    | right side | 0 | 0 | 0 | 0 | 0 | 0 | 0 | 0 | 0 | 0 | 0  | 0  | 0 | 0  |
| <i>Calumma hilleniusi</i>  | ZSM 593/1998           | f  | left side  | 0 | 4 | 6 | 0 | 4 | 0 | 0 | 5 | 0 | 4 | 8  | 6  | 7 | 30 |
|                            |                        |    | right side | 0 | 3 | 8 | 0 | 4 | 0 | 0 | 4 | 0 | 3 | 9  | 8  | 0 | 0  |
| <i>Calumma hilleniusi</i>  | ZSM 594/1998           | f  | left side  | 0 | 5 | 6 | 0 | 6 | 0 | 0 | 5 | 0 | 3 | 7  | 8  | 0 | 0  |
|                            |                        |    | right side | 0 | 3 | 8 | 0 | 4 | 0 | 0 | 4 | 0 | 3 | 9  | 9  | 0 | 0  |
| <i>Calumma hilleniusi</i>  | ZSM 545/2001           | f  | left side  | 0 | 0 | 0 | 0 | 0 | 0 | 0 | 0 | 0 | 0 | 0  | 0  | 0 | 0  |
|                            |                        |    | right side | 0 | 0 | 0 | 0 | 0 | 0 | 0 | 0 | 0 | 0 | 0  | 0  | 0 | 0  |
| <i>Calumma peltierorum</i> | ZSM 1725/2010          | m  | left side  | 4 | 5 | 4 | 0 | 7 | 0 | 0 | 3 | 0 | 7 | 6  | 8  | 7 | 50 |
|                            |                        |    | right side | 4 | 6 | 6 | 0 | 6 | 3 | 0 | 4 | 0 | 7 | 7  | 12 | 0 | 0  |
| <i>Calumma peltierorum</i> | ZSM 518/2014           | m  | left side  | 6 | 3 | 4 | 0 | 9 | 7 | 0 | 7 | 1 | 5 | 4  | 13 | 8 | 50 |
|                            |                        |    | right side | 6 | 3 | 5 | 0 | 7 | 4 | 0 | 6 | 2 | 3 | 7  | 12 | 0 | 0  |
| <i>Calumma peltierorum</i> | ZSM 519/2014           | f  | left side  | 2 | 0 | 5 | 0 | 5 | 1 | 0 | 4 | 0 | 5 | 3  | 8  | 7 | 50 |
|                            |                        |    | right side | 2 | 0 | 3 | 0 | 7 | 1 | 0 | 4 | 2 | 4 | 3  | 10 | 0 | 0  |
| <i>Calumma peltierorum</i> | ZSM 520/2014           | f  | left side  | 3 | 0 | 7 | 0 | 7 | 1 | 0 | 6 | 0 | 4 | 6  | 9  | 9 | 15 |

|                                |               |    |            |   |   |   |   |    |   |   |   |   |   |   |    |   |     |
|--------------------------------|---------------|----|------------|---|---|---|---|----|---|---|---|---|---|---|----|---|-----|
|                                |               |    | right side | 2 | 0 | 7 | 0 | 7  | 2 | 0 | 5 | 0 | 4 | 5 | 8  | 0 | 0   |
| <i>Calumma peltierorum</i>     | ZSM 521/2014  | f  | left side  | 0 | 2 | 4 | 0 | 5  | 4 | 0 | 5 | 0 | 6 | 4 | 8  | 8 | 40  |
|                                |               |    | right side | 0 | 2 | 4 | 0 | 9  | 3 | 0 | 7 | 0 | 6 | 3 | 12 | 0 | 0   |
| <i>Calumma peyrierasi</i>      | ZSM 522/2014  | m  | left side  | 0 | 0 | 4 | 0 | 5  | 0 | 0 | 4 | 0 | 0 | 0 | 0  | 0 | 0   |
|                                |               |    | right side | 0 | 0 | 4 | 1 | 3  | 0 | 0 | 4 | 0 | 0 | 0 | 0  | 0 | 0   |
| <i>Calumma peyrierasi</i>      | ZSM 1726/2010 | jm | left side  | 0 | 1 | 3 | 0 | 1  | 0 | 0 | 5 | 0 | 0 | 0 | 0  | 0 | 0   |
|                                |               |    | right side | 0 | 1 | 2 | 0 | 4  | 0 | 0 | 4 | 0 | 1 | 0 | 0  | 0 | 0   |
| <i>Calumma peyrierasi</i>      | ZSM 1727/2010 | f  | left side  | 0 | 0 | 4 | 0 | 7  | 0 | 0 | 6 | 0 | 1 | 0 | 0  | 0 | 0   |
|                                |               |    | right side | 0 | 1 | 3 | 0 | 7  | 0 | 0 | 6 | 0 | 1 | 0 | 0  | 0 | 0   |
| <i>Calumma peyrierasi</i>      | ZSM 523/2014  | f  | left side  | 0 | 0 | 3 | 0 | 7  | 0 | 0 | 2 | 0 | 0 | 0 | 0  | 0 | 0   |
|                                |               |    | right side | 0 | 0 | 3 | 0 | 7  | 0 | 0 | 4 | 0 | 0 | 0 | 0  | 0 | 0   |
| <i>Calumma tsaratananaense</i> | ZSM 524/2014  | m  | left side  | 0 | 0 | 1 | 0 | 0  | 0 | 0 | 2 | 0 | 0 | 0 | 0  | 0 | 0   |
|                                |               |    | right side | 0 | 0 | 1 | 0 | 0  | 0 | 0 | 2 | 0 | 0 | 0 | 0  | 0 | 0   |
| <i>Calumma tsaratananaense</i> | ZSM 1728/2010 | f  | left side  | 0 | 0 | 0 | 0 | 0  | 0 | 0 | 1 | 0 | 0 | 0 | 0  | 0 | 0   |
|                                |               |    | right side | 0 | 0 | 0 | 0 | 0  | 0 | 0 | 1 | 0 | 0 | 0 | 0  | 0 | 0   |
| <b><i>Calumma furcifer</i></b> |               |    |            |   |   |   |   |    |   |   |   |   |   |   |    |   |     |
| <b>group</b>                   |               |    |            |   |   |   |   |    |   |   |   |   |   |   |    |   |     |
| <i>Calumma andringitraense</i> | ZSM 554/2001  | m  | left side  | 0 | 0 | 2 | 0 | 1  | 0 | 0 | 2 | 0 | 0 | 0 | 0  | 0 | 0   |
|                                |               |    | right side | 0 | 0 | 4 | 1 | 5  | 1 | 0 | 3 | 0 | 0 | 0 | 0  | 0 | 0   |
| <i>Calumma andringitraense</i> | ZSM 128/2005  | m  | left side  | 0 | 3 | 5 | 3 | 10 | 1 | 0 | 4 | 0 | 0 | 0 | 0  | 0 | 7   |
|                                |               |    | right side | 0 | 3 | 6 | 2 | 7  | 1 | 0 | 4 | 0 | 0 | 0 | 0  | 0 | 0   |
| <i>Calumma andringitraense</i> | ZSM 129/2005  | m  | left side  | 0 | 2 | 6 | 1 | 10 | 0 | 0 | 3 | 0 | 0 | 0 | 0  | 0 | 11  |
|                                |               |    | right side | 0 | 2 | 8 | 1 | 12 | 1 | 0 | 3 | 0 | 0 | 0 | 0  | 0 | 0   |
| <i>Calumma andringitraense</i> | ZSM 130/2005  | m  | left side  | 0 | 1 | 5 | 5 | 9  | 1 | 0 | 3 | 0 | 0 | 0 | 0  | 0 | 0   |
|                                |               |    | right side | 0 | 1 | 6 | 1 | 10 | 0 | 0 | 3 | 0 | 0 | 0 | 0  | 0 | 9   |
| <i>Calumma andringitraense</i> | ZSM 131/2005  | f  | left side  | 0 | 0 | 4 | 1 | 1  | 0 | 0 | 2 | 0 | 0 | 0 | 0  | 0 | 0   |
|                                |               |    | right side | 0 | 0 | 2 | 1 | 2  | 1 | 0 | 2 | 0 | 0 | 0 | 0  | 0 | 0   |
| <i>Calumma furcifer</i>        | ZSM 656/2014  | m  | left side  | 1 | 2 | 6 | 2 | 9  | 0 | 0 | 6 | 3 | 1 | 0 | 0  | 0 | >30 |
|                                |               |    | right side | 1 | 3 | 7 | 3 | 9  | 0 | 0 | 7 | 3 | 1 | 0 | 0  | 0 | 0   |
| <i>Calumma furcifer</i>        | ZSM 225/2002  | m  | left side  | 1 | 1 | 6 | 0 | 7  | 0 | 0 | 6 | 0 | 0 | 0 | 0  | 0 | 0   |
|                                |               |    | right side | 1 | 1 | 5 | 0 | 5  | 0 | 0 | 6 | 0 | 0 | 0 | 0  | 0 | 0   |
| <i>Calumma furcifer</i>        | ZSM 657/2014  | f  | left side  | 0 | 2 | 4 | 1 | 4  | 0 | 0 | 5 | 3 | 1 | 0 | 0  | 0 | 7   |
|                                |               |    | right side | 0 | 2 | 6 | 1 | 5  | 0 | 0 | 5 | 2 | 1 | 0 | 0  | 0 | 0   |
| <i>Calumma furcifer</i>        | ZSM 136/2016  | f  | left side  | 0 | 1 | 4 | 0 | 7  | 0 | 0 | 6 | 1 | 0 | 0 | 0  | 0 | >20 |
|                                |               |    | right side | 0 | 1 | 5 | 1 | 7  | 0 | 0 | 7 | 2 | 0 | 0 | 0  | 0 | 0   |
| <i>Calumma gastrotaenia</i>    | ZSM 140/2016  | m  | left side  | 0 | 1 | 5 | 0 | 6  | 0 | 0 | 5 | 0 | 0 | 0 | 0  | 0 | 0   |
|                                |               |    | right side | 0 | 1 | 4 | 0 | 4  | 0 | 0 | 4 | 0 | 0 | 0 | 0  | 0 | 0   |
| <i>Calumma gastrotaenia</i>    | ZSM 226/2002  | m  | left side  | 0 | 2 | 6 | 3 | 6  | 0 | 0 | 4 | 2 | 0 | 0 | 0  | 0 | 0   |
|                                |               |    | right side | 0 | 1 | 7 | 2 | 7  | 0 | 0 | 3 | 1 | 0 | 0 | 0  | 0 | 0   |
| <i>Calumma gastrotaenia</i>    | ZSM 506/2014  | m  | left side  | 1 | 2 | 7 | 5 | 9  | 0 | 0 | 4 | 0 | 0 | 0 | 0  | 0 | 1   |
|                                |               |    | right side | 1 | 2 | 6 | 4 | 8  | 0 | 0 | 3 | 0 | 0 | 0 | 0  | 0 | 0   |
| <i>Calumma gastrotaenia</i>    | ZSM 659/2014  | m  | left side  | 1 | 3 | 5 | 5 | 8  | 0 | 0 | 7 | 4 | 1 | 0 | 0  | 0 | >40 |
|                                |               |    | right side | 1 | 3 | 6 | 5 | 8  | 0 | 0 | 8 | 4 | 2 | 0 | 0  | 0 | 0   |
| <i>Calumma gastrotaenia</i>    | ZSM 508/2014  | m  | left side  | 3 | 7 | 7 | 5 | 4  | 0 | 0 | 3 | 2 | 0 | 2 | 0  | 0 | 10  |

|                             |               |   |            |   |   |   |   |    |   |   |   |   |   |   |   |   |     |
|-----------------------------|---------------|---|------------|---|---|---|---|----|---|---|---|---|---|---|---|---|-----|
|                             |               |   | right side | 2 | 3 | 8 | 6 | 6  | 0 | 0 | 5 | 2 | 0 | 3 | 0 | 0 | 0   |
| <i>Calumma</i>              |               |   | left side  | 0 | 2 | 6 | 0 | 8  | 0 | 0 | 4 | 2 | 0 | 0 | 0 | 0 | 0   |
| <i>gastrotaenia</i>         | ZSM 507/2014  | f |            |   |   |   |   |    |   |   |   |   |   |   |   |   |     |
|                             |               |   | right side | 0 | 2 | 6 | 1 | 6  | 0 | 0 | 4 | 2 | 0 | 0 | 0 | 0 | 0   |
| <i>Calumma</i>              |               |   | left side  | 0 | 2 | 5 | 0 | 9  | 0 | 0 | 3 | 0 | 0 | 0 | 0 | 0 | 0   |
| <i>gastrotaenia</i>         | ZSM 509/2014  | f |            |   |   |   |   |    |   |   |   |   |   |   |   |   |     |
|                             |               |   | right side | 0 | 2 | 8 | 0 | 7  | 0 | 0 | 4 | 2 | 0 | 0 | 0 | 0 | 0   |
| <i>Calumma</i>              |               |   | left side  | 0 | 3 | 7 | 3 | 8  | 0 | 0 | 7 | 2 | 1 | 0 | 0 | 0 | 0   |
| <i>gastrotaenia</i>         | ZSM 658/2014  | f |            |   |   |   |   |    |   |   |   |   |   |   |   |   |     |
|                             |               |   | right side | 0 | 3 | 6 | 6 | 9  | 0 | 0 | 8 | 3 | 1 | 0 | 0 | 0 | 0   |
| <i>Calumma glawi</i>        | ZSM 2042/2008 | m | left side  | 1 | 2 | 7 | 4 | 7  | 0 | 0 | 5 | 2 | 2 | 3 | 0 | 0 | 10  |
|                             |               |   | right side | 1 | 2 | 5 | 2 | 9  | 0 | 0 | 5 | 3 | 1 | 4 | 0 | 0 | 0   |
| <i>Calumma guillaumeti</i>  | ZSM 440/2005  | m | left side  | 0 | 5 | 6 | 4 | 8  | 2 | 0 | 5 | 3 | 0 | 5 | 0 | 0 | >20 |
|                             |               |   | right side | 0 | 5 | 5 | 4 | 11 | 1 | 0 | 8 | 2 | 0 | 3 | 0 | 0 | 0   |
| <i>Calumma guillaumeti</i>  | ZSM 1701/2012 | m | left side  | 0 | 2 | 5 | 4 | 7  | 0 | 0 | 5 | 2 | 0 | 0 | 0 | 0 | 0   |
|                             |               |   | right side | 0 | 2 | 6 | 3 | 8  | 0 | 0 | 3 | 2 | 0 | 0 | 0 | 0 | 0   |
| <i>Calumma guillaumeti</i>  | ZSM 34/2016   | m | left side  | 1 | 3 | 6 | 2 | 11 | 0 | 0 | 4 | 3 | 0 | 0 | 0 | 0 | 0   |
|                             |               |   | right side | 1 | 4 | 5 | 2 | 10 | 0 | 0 | 5 | 1 | 0 | 0 | 0 | 0 | 0   |
| <i>Calumma guillaumeti</i>  | ZSM 1703/2012 | m | left side  | 0 | 0 | 4 | 4 | 6  | 0 | 0 | 4 | 1 | 0 | 0 | 0 | 0 | 0   |
|                             |               |   | right side | 0 | 0 | 4 | 4 | 6  | 0 | 0 | 5 | 1 | 0 | 0 | 0 | 0 | 0   |
| <i>Calumma guillaumeti</i>  | ZSM 1702/2012 | f | left side  | 0 | 2 | 4 | 2 | 8  | 0 | 0 | 4 | 2 | 0 | 0 | 0 | 0 | 0   |
|                             |               |   | right side | 0 | 2 | 4 | 2 | 8  | 0 | 0 | 4 | 2 | 0 | 0 | 0 | 0 | 0   |
| <i>Calumma guillaumeti</i>  | ZSM 33/2016   | f | left side  | 0 | 2 | 5 | 1 | 9  | 0 | 0 | 3 | 2 | 0 | 0 | 0 | 0 | 0   |
|                             |               |   | right side | 0 | 2 | 7 | 3 | 9  | 0 | 0 | 4 | 3 | 0 | 0 | 0 | 0 | 0   |
| <i>Calumma tarzan</i>       | ZSM 219/2010  | m | left side  | 2 | 2 | 8 | 4 | 8  | 0 | 0 | 4 | 2 | 0 | 0 | 0 | 0 | 8   |
|                             |               |   | right side | 2 | 2 | 7 | 2 | 8  | 0 | 0 | 4 | 2 | 0 | 0 | 0 | 0 | 0   |
| <i>Calumma tarzan</i>       | ZSM 222/2010  | f | left side  | 0 | 3 | 3 | 1 | 8  | 0 | 0 | 3 | 0 | 0 | 0 | 0 | 0 | 0   |
|                             |               |   | right side | 0 | 2 | 4 | 0 | 8  | 0 | 0 | 3 | 1 | 0 | 0 | 0 | 0 | 0   |
| <i>Calumma vencesi</i>      | ZSM 50/2011   | m | left side  | 2 | 4 | 6 | 3 | 7  | 0 | 0 | 7 | 2 | 2 | 0 | 0 | 0 | >40 |
|                             |               |   | right side | 3 | 3 | 7 | 4 | 8  | 0 | 0 | 8 | 4 | 2 | 0 | 0 | 0 | 0   |
| <i>Calumma vencesi</i>      | ZSM 462/2010  | m | left side  | 0 | 0 | 4 | 3 | 7  | 0 | 0 | 5 | 1 | 0 | 0 | 0 | 0 | >30 |
|                             |               |   | right side | 0 | 0 | 5 | 2 | 4  | 0 | 0 | 5 | 1 | 0 | 0 | 0 | 0 | 0   |
| <i>Calumma vencesi</i>      | ZSM 620/2009  | m | left side  | 1 | 3 | 7 | 7 | 9  | 0 | 0 | 6 | 6 | 0 | 7 | 0 | 0 | >50 |
|                             |               |   | right side | 1 | 4 | 7 | 5 | 9  | 0 | 0 | 8 | 5 | 0 | 8 | 0 | 0 | 0   |
| <b>Calumm nasutum group</b> |               |   |            |   |   |   |   |    |   |   |   |   |   |   |   |   |     |
| <i>Calumma boettgeri</i>    | ZSM 440/2000  | m | left side  | 0 | 2 | 5 | 0 | 7  | 0 | 0 | 6 | 0 | 0 | 0 | 0 | 0 | 0   |
|                             |               |   | right side | 0 | 3 | 5 | 0 | 5  | 0 | 0 | 5 | 0 | 0 | 0 | 0 | 0 | 0   |
| <i>Calumma boettgeri</i>    | ZSM 444/2000  | m | left side  | 0 | 1 | 4 | 0 | 6  | 0 | 0 | 6 | 0 | 0 | 0 | 0 | 0 | 0   |
|                             |               |   | right side | 0 | 2 | 6 | 0 | 6  | 0 | 0 | 7 | 0 | 0 | 0 | 0 | 0 | 0   |
| <i>Calumma boettgeri</i>    | ZSM 227/2002  | f | left side  | 0 | 0 | 3 | 0 | 2  | 0 | 0 | 2 | 0 | 0 | 0 | 0 | 0 | 0   |
|                             |               |   | right side | 0 | 0 | 5 | 0 | 4  | 0 | 0 | 3 | 0 | 0 | 0 | 0 | 0 | 0   |
| <i>Calumma fallax</i>       | ZSM 691/2009  | f | left side  | 0 | 0 | 0 | 0 | 0  | 0 | 0 | 0 | 0 | 0 | 0 | 0 | 0 | 0   |
|                             |               |   | right side | 0 | 0 | 0 | 0 | 0  | 0 | 0 | 0 | 0 | 0 | 0 | 0 | 0 | 0   |
| <i>Calumma gallus</i>       | ZSM 137/2016  | m | left side  | 2 | 3 | 8 | 1 | 5  | 0 | 0 | 6 | 0 | 0 | 2 | 0 | 0 | 10  |
|                             |               |   | right side | 2 | 4 | 7 | 1 | 6  | 0 | 0 | 5 | 1 | 1 | 2 | 0 | 0 | 0   |
| <i>Calumma gallus</i>       | ZSM 139/2018  | m | left side  | 1 | 4 | 6 | 0 | 7  | 0 | 0 | 7 | 0 | 0 | 0 | 0 | 0 | 0   |
|                             |               |   | right side | 2 | 5 | 9 | 0 | 7  | 0 | 0 | 6 | 0 | 0 | 0 | 0 | 0 | 0   |

|                         |               |    |            |   |   |   |   |   |   |   |   |   |   |   |   |   |     |
|-------------------------|---------------|----|------------|---|---|---|---|---|---|---|---|---|---|---|---|---|-----|
| <i>Calumma gallus</i>   | ZSM 321/2000  | m  | left side  | 0 | 0 | 3 | 0 | 2 | 0 | 0 | 7 | 2 | 1 | 0 | 0 | 0 | 0   |
|                         |               |    | right side | 0 | 1 | 8 | 0 | 5 | 0 | 0 | 5 | 0 | 1 | 0 | 0 | 0 | 0   |
| <i>Calumma gallus</i>   | ZSM 792/2003  | m  | left side  | 3 | 2 | 7 | 0 | 6 | 0 | 0 | 6 | 0 | 3 | 0 | 0 | 0 | 0   |
|                         |               |    | right side | 3 | 3 | 6 | 0 | 6 | 0 | 0 | 5 | 0 | 3 | 0 | 0 | 0 | 0   |
| <i>Calumma gallus</i>   | ZSM 138/2016  | f  | left side  | 0 | 2 | 7 | 1 | 7 | 0 | 0 | 6 | 1 | 0 | 0 | 0 | 0 | 4   |
|                         |               |    | right side | 0 | 2 | 8 | 0 | 7 | 0 | 0 | 6 | 0 | 0 | 0 | 0 | 0 | 0   |
| <i>Calumma gehringi</i> | ZSM 2840/2010 | m  | left side  | 0 | 2 | 8 | 3 | 3 | 0 | 0 | 5 | 3 | 3 | 0 | 0 | 4 | >20 |
|                         |               |    | right side | 0 | 4 | 8 | 0 | 5 | 0 | 0 | 5 | 4 | 2 | 0 | 0 | 0 | 0   |
| <i>Calumma gehringi</i> | ZSM 2841/2010 | m  | left side  | 0 | 1 | 7 | 0 | 3 | 0 | 0 | 4 | 0 | 0 | 0 | 0 | 0 | 15  |
|                         |               |    | right side | 0 | 2 | 6 | 1 | 5 | 0 | 0 | 4 | 0 | 0 | 0 | 0 | 0 | 0   |
| <i>Calumma gehringi</i> | ZSM 2851/2010 | m  | left side  | 0 | 4 | 5 | 5 | 6 | 0 | 0 | 6 | 2 | 2 | 0 | 0 | 0 | 0   |
|                         |               |    | right side | 0 | 5 | 5 | 4 | 7 | 0 | 0 | 5 | 2 | 2 | 0 | 0 | 0 | 0   |
| <i>Calumma gehringi</i> | ZSM 2842/2010 | m  | left side  | 0 | 3 | 7 | 1 | 3 | 0 | 0 | 3 | 0 | 1 | 3 | 0 | 0 | 15  |
|                         |               |    | right side | 0 | 3 | 4 | 0 | 4 | 1 | 0 | 4 | 0 | 2 | 4 | 0 | 0 | 0   |
| <i>Calumma gehringi</i> | ZSM 1835/2010 | m  | left side  | 0 | 3 | 5 | 0 | 2 | 0 | 0 | 4 | 0 | 0 | 5 | 0 | 0 | 20  |
|                         |               |    | right side | 1 | 3 | 6 | 0 | 3 | 0 | 0 | 5 | 0 | 2 | 2 | 0 | 0 | 0   |
| <i>Calumma gehringi</i> | ZSM 1834/2010 | m  | left side  | 0 | 1 | 5 | 2 | 2 | 0 | 0 | 4 | 0 | 0 | 0 | 0 | 0 | 0   |
|                         |               |    | right side | 1 | 2 | 7 | 2 | 3 | 0 | 0 | 5 | 2 | 0 | 0 | 0 | 0 | 0   |
| <i>Calumma gehringi</i> | ZSM 2843/2010 | m  | left side  | 2 | 3 | 7 | 4 | 5 | 2 | 0 | 5 | 0 | 3 | 4 | 0 | 4 | >30 |
|                         |               |    | right side | 3 | 4 | 7 | 4 | 7 | 0 | 0 | 7 | 0 | 3 | 2 | 0 | 0 | 0   |
| <i>Calumma gehringi</i> | ZSM 42/2016   | m  | left side  | 0 | 2 | 5 | 3 | 6 | 0 | 0 | 4 | 0 | 0 | 0 | 0 | 4 | 10  |
|                         |               |    | right side | 0 | 3 | 6 | 4 | 3 | 0 | 0 | 5 | 0 | 0 | 0 | 0 | 0 | 0   |
| <i>Calumma gehringi</i> | ZSM 39/2016   | m  | left side  | 3 | 3 | 4 | 4 | 7 | 0 | 0 | 6 | 2 | 4 | 0 | 0 | 0 | 15  |
|                         |               |    | right side | 3 | 3 | 6 | 6 | 7 | 0 | 0 | 5 | 3 | 4 | 0 | 0 | 0 | 0   |
| <i>Calumma gehringi</i> | ZSM 2844/2010 | f  | left side  | 0 | 2 | 4 | 4 | 5 | 0 | 0 | 5 | 2 | 0 | 0 | 0 | 4 | 20  |
|                         |               |    | right side | 0 | 3 | 7 | 5 | 5 | 0 | 0 | 6 | 2 | 0 | 0 | 0 | 0 | 0   |
| <i>Calumma gehringi</i> | ZSM 2847/2010 | f  | left side  | 0 | 0 | 6 | 4 | 4 | 0 | 0 | 5 | 3 | 0 | 3 | 0 | 0 | 0   |
|                         |               |    | right side | 0 | 0 | 6 | 3 | 4 | 0 | 0 | 5 | 2 | 0 | 0 | 0 | 0 | 0   |
| <i>Calumma gehringi</i> | ZSM 2852/2010 | f  | left side  | 0 | 2 | 5 | 3 | 5 | 0 | 0 | 2 | 0 | 1 | 0 | 0 | 0 | 0   |
|                         |               |    | right side | 0 | 3 | 4 | 4 | 5 | 0 | 0 | 5 | 3 | 2 | 4 | 0 | 0 | 0   |
| <i>Calumma gehringi</i> | ZSM 2845/2010 | f  | left side  | 0 | 2 | 6 | 3 | 5 | 0 | 0 | 5 | 0 | 0 | 5 | 0 | 4 | 20  |
|                         |               |    | right side | 0 | 1 | 6 | 4 | 5 | 0 | 0 | 6 | 0 | 1 | 5 | 0 | 0 | 0   |
| <i>Calumma gehringi</i> | ZSM 2848/2010 | jf | left side  | 0 | 0 | 6 | 2 | 4 | 0 | 0 | 5 | 0 | 0 | 0 | 0 | 0 | 0   |
|                         |               |    | right side | 0 | 0 | 4 | 2 | 5 | 0 | 0 | 5 | 0 | 0 | 0 | 0 | 0 | 0   |
| <i>Calumma gehringi</i> | ZSM 38/2016   | f  | left side  | 0 | 2 | 7 | 0 | 5 | 0 | 0 | 4 | 0 | 0 | 2 | 0 | 4 | 0   |
|                         |               |    | right side | 0 | 2 | 5 | 0 | 4 | 0 | 0 | 6 | 2 | 0 | 0 | 0 | 0 | 0   |
| <i>Calumma gehringi</i> | ZSM 40/2016   | f  | left side  | 0 | 0 | 6 | 1 | 3 | 0 | 0 | 4 | 0 | 0 | 0 | 0 | 0 | 0   |
|                         |               |    | right side | 0 | 0 | 7 | 1 | 2 | 0 | 0 | 4 | 0 | 0 | 0 | 0 | 0 | 0   |
| <i>Calumma gehringi</i> | ZSM 41/2016   | f  | left side  | 0 | 2 | 6 | 3 | 5 | 0 | 0 | 4 | 0 | 1 | 0 | 0 | 4 | 0   |
|                         |               |    | right side | 0 | 2 | 6 | 3 | 4 | 0 | 0 | 4 | 0 | 1 | 0 | 0 | 0 | 0   |
| <i>Calumma guibei</i>   | ZSM 2853/2010 | m  | left side  | 2 | 3 | 6 | 4 | 6 | 2 | 0 | 5 | 0 | 2 | 4 | 0 | 0 | 15  |
|                         |               |    | right side | 2 | 3 | 6 | 3 | 6 | 0 | 0 | 5 | 0 | 0 | 4 | 0 | 0 | 0   |
| <i>Calumma guibei</i>   | ZSM 2854/2010 | m  | left side  | 2 | 2 | 7 | 5 | 5 | 3 | 0 | 5 | 0 | 2 | 0 | 0 | 5 | 15  |
|                         |               |    | right side | 2 | 2 | 8 | 4 | 5 | 3 | 0 | 6 | 0 | 0 | 0 | 0 | 0 | 0   |
| <i>Calumma guibei</i>   | ZSM 2857/2010 | f  | left side  | 0 | 2 | 4 | 3 | 4 | 0 | 0 | 5 | 0 | 0 | 3 | 0 | 2 | 0   |

|                             |               |    |            |   |   |   |   |   |   |   |   |   |   |   |   |   |     |
|-----------------------------|---------------|----|------------|---|---|---|---|---|---|---|---|---|---|---|---|---|-----|
|                             |               |    | right side | 0 | 0 | 6 | 4 | 3 | 0 | 0 | 5 | 0 | 1 | 0 | 0 | 0 | 0   |
| <i>Calumma guibei</i>       | ZSM 2856/2010 | f  | left side  | 0 | 0 | 7 | 3 | 4 | 1 | 0 | 5 | 2 | 1 | 3 | 0 | 4 | 0   |
|                             |               |    | right side | 0 | 0 | 6 | 4 | 5 | 0 | 0 | 6 | 1 | 0 | 2 | 0 | 0 | 0   |
| <i>Calumma guibei</i>       | ZSM 2855/2010 | m  | left side  | 0 | 4 | 5 | 4 | 5 | 0 | 0 | 5 | 3 | 2 | 0 | 0 | 4 | 10  |
|                             |               |    | right side | 0 | 3 | 5 | 3 | 6 | 0 | 0 | 5 | 3 | 2 | 0 | 0 | 0 | 0   |
| <i>Calumma guibei</i> (cf.) | ZSM 1688/2012 | m  | left side  | 4 | 3 | 7 | 4 | 5 | 0 | 0 | 6 | 4 | 3 | 5 | 5 | 4 | >30 |
|                             |               |    | right side | 4 | 3 | 8 | 4 | 7 | 4 | 0 | 8 | 5 | 3 | 5 | 4 | 0 | 0   |
| <i>Calumma guibei</i> (cf.) | ZSM 1686/2012 | jm | left side  | 0 | 0 | 3 | 0 | 5 | 0 | 0 | 6 | 3 | 1 | 0 | 0 | 0 | 0   |
|                             |               |    | right side | 0 | 0 | 4 | 0 | 3 | 0 | 0 | 6 | 2 | 1 | 0 | 0 | 0 | 0   |
| <i>Calumma guibei</i> (cf.) | ZSM 1685/2012 | j  | left side  | 0 | 0 | 4 | 0 | 5 | 0 | 0 | 6 | 1 | 0 | 0 | 0 | 1 | 0   |
|                             |               |    | right side | 0 | 0 | 4 | 0 | 5 | 0 | 0 | 7 | 0 | 0 | 0 | 0 | 0 | 0   |
| <i>Calumma guibei</i> (cf.) | ZSM 1687/2012 | f  | left side  | 0 | 0 | 4 | 0 | 4 | 0 | 0 | 7 | 1 | 0 | 0 | 0 | 0 | 0   |
|                             |               |    | right side | 0 | 0 | 5 | 0 | 5 | 0 | 0 | 7 | 1 | 0 | 0 | 0 | 0 | 0   |
| <i>Calumma guibei</i> (cf.) | ZSM 2948/2010 | m  | left side  | 5 | 2 | 5 | 4 | 4 | 2 | 0 | 7 | 0 | 1 | 5 | 0 | 4 | >40 |
|                             |               |    | right side | 5 | 2 | 5 | 4 | 9 | 2 | 0 | 7 | 0 | 1 | 5 | 0 | 0 | 0   |
| <i>Calumma linotum</i>      | ZSM 1683/2012 | m  | left side  | 0 | 2 | 4 | 0 | 0 | 0 | 0 | 6 | 4 | 0 | 0 | 0 | 0 | 0   |
|                             |               |    | right side | 0 | 2 | 4 | 0 | 2 | 0 | 0 | 4 | 2 | 0 | 0 | 0 | 3 | 10  |
| <i>Calumma linotum</i>      | ZSM 2072/2007 | m  | left side  | 0 | 2 | 3 | 0 | 7 | 0 | 0 | 5 | 3 | 3 | 0 | 0 | 4 | 8   |
|                             |               |    | right side | 0 | 2 | 4 | 1 | 8 | 0 | 0 | 5 | 3 | 2 | 0 | 0 | 0 | 0   |
| <i>Calumma linotum</i>      | ZSM 551/2001  | f  | left side  | 0 | 1 | 4 | 1 | 4 | 0 | 0 | 4 | 0 | 0 | 0 | 0 | 0 | 0   |
|                             |               |    | right side | 0 | 1 | 4 | 1 | 4 | 0 | 0 | 5 | 0 | 0 | 0 | 0 | 0 | 0   |
| <i>Calumma linotum</i> cf.  | ZSM 43/2016   | m  | left side  | 0 | 3 | 8 | 3 | 4 | 0 | 0 | 7 | 0 | 0 | 0 | 0 | 0 | 20  |
|                             |               |    | right side | 1 | 5 | 7 | 4 | 7 | 0 | 0 | 5 | 0 | 0 | 0 | 0 | 0 | 0   |
| <i>Calumma linotum</i> cf.  | ZSM 142/2016  | f  | left side  | 0 | 0 | 2 | 0 | 2 | 0 | 0 | 4 | 0 | 1 | 0 | 0 | 0 | 0   |
|                             |               |    | right side | 0 | 0 | 3 | 0 | 1 | 0 | 0 | 2 | 0 | 0 | 0 | 0 | 0 | 0   |
| <i>Calumma linotum</i> cf.  | ZSM 143/2016  | f  | left side  | 0 | 0 | 2 | 0 | 4 | 0 | 0 | 3 | 0 | 0 | 0 | 0 | 0 | 0   |
|                             |               |    | right side | 0 | 0 | 2 | 0 | 5 | 0 | 0 | 5 | 0 | 0 | 0 | 0 | 0 | 0   |
| <i>Calumma nasutum</i>      | ZSM 663/2014  | m  | left side  | 0 | 3 | 7 | 3 | 6 | 0 | 0 | 7 | 3 | 3 | 3 | 0 | 0 | 10  |
|                             |               |    | right side | 0 | 3 | 7 | 5 | 5 | 2 | 0 | 6 | 2 | 3 | 2 | 0 | 0 | 0   |
| <i>Calumma nasutum</i>      | ZSM 618/ 2009 | m  | left side  | 0 | 2 | 7 | 1 | 5 | 0 | 0 | 5 | 2 | 1 | 0 | 0 | 0 | 0   |
|                             |               |    | right side | 0 | 5 | 7 | 2 | 7 | 0 | 0 | 6 | 2 | 1 | 0 | 0 | 0 | 0   |
| <i>Calumma nasutum</i>      | ZSM 661/2014  | f  | left side  | 0 | 0 | 4 | 0 | 6 | 0 | 0 | 5 | 3 | 3 | 0 | 0 | 0 | 0   |
|                             |               |    | right side | 0 | 0 | 4 | 0 | 5 | 0 | 0 | 5 | 3 | 3 | 0 | 0 | 0 | 0   |
| <i>Calumma nasutum</i>      | ZSM 662/2014  | f  | left side  | 0 | 0 | 4 | 1 | 5 | 0 | 0 | 4 | 0 | 0 | 0 | 0 | 0 | 0   |
|                             |               |    | right side | 0 | 0 | 4 | 1 | 4 | 0 | 0 | 6 | 1 | 1 | 0 | 0 | 0 | 0   |
| <i>Calumma nasutum</i>      | ZSM 553/2001  | f  | left side  | 0 | 0 | 5 | 0 | 7 | 0 | 0 | 6 | 0 | 3 | 0 | 0 | 0 | 0   |
|                             |               |    | right side | 0 | 1 | 5 | 0 | 6 | 0 | 0 | 5 | 0 | 3 | 0 | 0 | 0 | 0   |
| <i>Calumma nasutum</i>      | ZSM 693/2009  | m  | left side  | 0 | 0 | 3 | 0 | 6 | 0 | 0 | 5 | 0 | 0 | 0 | 0 | 0 | 0   |
|                             |               |    | right side | 0 | 0 | 3 | 0 | 6 | 0 | 0 | 5 | 1 | 1 | 0 | 0 | 0 | 0   |
| <i>Calumma nasutum</i>      | ZSM 694/2003  | m  | left side  | 0 | 1 | 2 | 0 | 5 | 0 | 0 | 5 | 0 | 2 | 0 | 0 | 0 | 0   |
|                             |               |    | right side | 0 | 1 | 1 | 0 | 6 | 0 | 0 | 5 | 1 | 2 | 0 | 0 | 0 | 0   |
| <i>Calumma nasutum</i>      | ZSM 134/2005  | m  | left side  | 0 | 0 | 2 | 0 | 5 | 0 | 0 | 5 | 0 | 3 | 0 | 0 | 0 | 0   |
|                             |               |    | right side | 0 | 0 | 2 | 0 | 6 | 0 | 0 | 5 | 0 | 3 | 0 | 0 | 0 | 0   |
| <i>Calumma nasutum</i>      | ZSM 924/2003  | m  | left side  | 0 | 2 | 5 | 0 | 6 | 0 | 0 | 4 | 0 | 3 | 0 | 0 | 2 | 0   |
|                             |               |    | right side | 0 | 1 | 6 | 0 | 9 | 0 | 0 | 6 | 0 | 2 | 3 | 0 | 0 | 0   |

|                                      |               |   |            |   |    |    |   |    |   |   |   |   |   |    |    |    |     |
|--------------------------------------|---------------|---|------------|---|----|----|---|----|---|---|---|---|---|----|----|----|-----|
| <i>Calumma nasutum</i>               | ZSM 441/2005  | m | left side  | 0 | 2  | 5  | 2 | 4  | 0 | 0 | 5 | 0 | 2 | 4  | 0  | 1  | 0   |
|                                      |               |   | right side | 0 | 2  | 6  | 3 | 3  | 0 | 0 | 7 | 4 | 3 | 4  | 0  | 0  | 0   |
| <i>Calumma nasutum</i>               | ZSM 443/2005  | f | left side  | 0 | 2  | 5  | 1 | 4  | 0 | 0 | 5 | 1 | 3 | 5  | 0  | 0  | 0   |
|                                      |               |   | right side | 0 | 2  | 6  | 0 | 3  | 0 | 0 | 5 | 3 | 0 | 4  | 0  | 0  | 0   |
| <i>Calumma nasutum</i>               | ZSM 619/2009  | m | left side  | 0 | 0  | 7  | 4 | 6  | 2 | 0 | 6 | 0 | 3 | 0  | 0  | 0  | 0   |
|                                      |               |   | right side | 0 | 0  | 5  | 2 | 6  | 2 | 0 | 6 | 0 | 2 | 0  | 0  | 0  | 0   |
| <i>Calumma nasutum</i>               | ZSM 146/2016  | f | left side  | 0 | 0  | 5  | 0 | 4  | 0 | 0 | 4 | 0 | 3 | 0  | 0  | 0  | 0   |
|                                      |               |   | right side | 0 | 0  | 5  | 0 | 5  | 0 | 0 | 5 | 0 | 3 | 0  | 0  | 0  | 0   |
| <i>Calumma nasutum</i>               | ZSM 147/2016  | f | left side  | 0 | 0  | 3  | 0 | 8  | 0 | 0 | 7 | 0 | 4 | 0  | 0  | 0  | 0   |
|                                      |               |   | right side | 0 | 0  | 3  | 0 | 10 | 0 | 0 | 6 | 0 | 3 | 0  | 0  | 0  | 0   |
| <i>Calumma nasutum</i>               | ZSM 148/2016  | f | left side  | 0 | 2  | 1  | 0 | 6  | 0 | 0 | 4 | 2 | 3 | 0  | 0  | 0  | 0   |
|                                      |               |   | right side | 0 | 0  | 5  | 2 | 6  | 0 | 0 | 5 | 0 | 3 | 0  | 0  | 0  | 0   |
| <i>Calumma nasutum</i>               | ZSM 149/2016  | f | left side  | 0 | 0  | 3  | 0 | 4  | 0 | 0 | 5 | 0 | 0 | 0  | 0  | 0  | 0   |
|                                      |               |   | right side | 0 | 0  | 4  | 0 | 5  | 0 | 0 | 5 | 0 | 0 | 0  | 0  | 0  | 0   |
| <i>Calumma nasutum</i>               | ZSM 145/2016  | m | left side  | 0 | 0  | 3  | 0 | 5  | 0 | 0 | 5 | 0 | 3 | 0  | 0  | 0  | 0   |
|                                      |               |   | right side | 0 | 0  | 3  | 0 | 7  | 0 | 0 | 5 | 0 | 2 | 0  | 0  | 0  | 0   |
| <i>Calumma nasutum</i>               | ZSM 645/2009  | m | left side  | 0 | 0  | 4  | 0 | 4  | 0 | 0 | 5 | 3 | 2 | 0  | 0  | 0  | 0   |
|                                      |               |   | right side | 0 | 0  | 4  | 0 | 5  | 1 | 0 | 4 | 4 | 3 | 0  | 0  | 0  | 0   |
| <i>Calumma nasutum</i>               | ZSM 144/2016  | f | left side  | 0 | 0  | 7  | 0 | 5  | 0 | 0 | 5 | 0 | 0 | 0  | 0  | 0  | 0   |
|                                      |               |   | right side | 0 | 0  | 6  | 0 | 5  | 0 | 0 | 4 | 0 | 0 | 0  | 0  | 0  | 0   |
| <i>Calumma vatosoa</i>               | MRSN R1628    | m | left side  | 1 | 4  | 10 | 3 | 7  | 3 | 0 | 6 | 3 | 6 | 0  | 0  | 0  | 5   |
|                                      |               |   | right side | 1 | 5  | 6  | 3 | 9  | 2 | 0 | 3 | 2 | 5 | 0  | 0  | 0  | 0   |
| <i>Calumma vohibola</i>              | ZSM 644/2009  | m | left side  | 0 | 0  | 4  | 1 | 7  | 0 | 0 | 5 | 4 | 1 | 0  | 0  | 0  | 0   |
|                                      |               |   | right side | 0 | 2  | 4  | 0 | 7  | 0 | 0 | 5 | 5 | 1 | 0  | 0  | 0  | 0   |
| <i>Calumma vohibola</i>              | ZSM 643/2009  | f | left side  | 0 | 0  | 4  | 0 | 5  | 0 | 0 | 5 | 3 | 0 | 0  | 0  | 0  | 0   |
|                                      |               |   | right side | 0 | 0  | 3  | 0 | 4  | 0 | 0 | 5 | 3 | 0 | 0  | 0  | 0  | 0   |
| <i>Calumma vohibola</i>              | ZSM 152/2016  | f | left side  | 0 | 0  | 2  | 0 | 3  | 0 | 0 | 5 | 0 | 0 | 0  | 0  | 0  | 0   |
|                                      |               |   | right side | 0 | 0  | 3  | 0 | 2  | 0 | 0 | 4 | 0 | 1 | 0  | 0  | 0  | 0   |
| <b><i>Calumma parsonii</i> group</b> |               |   |            |   |    |    |   |    |   |   |   |   |   |    |    |    |     |
| <i>Calumma ambreense</i>             | ZSM 1042/2003 | m | left side  | 5 | 6  | 7  | 0 | 8  | 6 | 0 | 0 | 0 | 0 | 15 | 39 | 0  | 100 |
|                                      |               |   | right side | 3 | 7  | 7  | 0 | 6  | 5 | 0 | 0 | 0 | 0 | 12 | 45 | 0  | 0   |
| <i>Calumma ambreense</i>             | ZSM 1682/2012 | f | left side  | 3 | 5  | 7  | 0 | 8  | 6 | 0 | 0 | 0 | 0 | 14 | 39 | 0  | 100 |
|                                      |               |   | right side | 2 | 4  | 9  | 0 | 7  | 6 | 0 | 0 | 0 | 0 | 15 | 46 | 0  | 0   |
| <i>Calumma capuroni</i>              | ZSM 132/2005  | m | left side  | 4 | 4  | 6  | 0 | 6  | 4 | 0 | 0 | 0 | 0 | 5  | 19 | 4  | 40  |
|                                      |               |   | right side | 2 | 4  | 7  | 0 | 7  | 1 | 0 | 0 | 0 | 0 | 7  | 20 | 0  | 0   |
| <i>Calumma capuroni</i>              | ZSM 5104/2005 | f | left side  | 4 | 6  | 7  | 0 | 5  | 4 | 0 | 0 | 0 | 0 | 9  | 27 | 5  | 60  |
|                                      |               |   | right side | 4 | 5  | 8  | 0 | 6  | 5 | 0 | 0 | 0 | 0 | 7  | 25 | 0  | 0   |
| <i>Calumma globifer</i>              | ZSM 141/2016  | m | left side  | 4 | 10 | 8  | 0 | 10 | 7 | 0 | 0 | 0 | 0 | 20 | 81 | 10 | 100 |
|                                      |               |   | right side | 8 | 8  | 8  | 0 | 8  | 6 | 0 | 0 | 0 | 0 | 21 | 85 | 0  | 0   |
| <i>Calumma globifer</i>              | ZSM 683/2003  | m | left side  | 4 | 11 | 8  | 0 | 7  | 5 | 0 | 0 | 0 | 0 | 15 | 51 | 8  | 100 |
|                                      |               |   | right side | 5 | 11 | 8  | 0 | 7  | 7 | 0 | 0 | 0 | 0 | 15 | 58 | 0  | 0   |
| <i>Calumma globifer</i>              | ZSM 221/2002  | f | left side  | 4 | 7  | 7  | 0 | 5  | 5 | 0 | 0 | 0 | 0 | 14 | 72 | 9  | 60  |
|                                      |               |   | right side | 4 | 7  | 8  | 0 | 7  | 6 | 0 | 0 | 0 | 0 | 15 | 65 | 0  | 0   |
| <i>Calumma oshaughnessyi</i>         | ZSM 1043/2003 | f | left side  | 6 | 5  | 9  | 0 | 6  | 4 | 0 | 0 | 0 | 0 | 13 | 48 | 0  | 100 |
|                                      |               |   | right side | 5 | 4  | 9  | 0 | 7  | 6 | 0 | 0 | 0 | 0 | 14 | 46 | 0  | 0   |

|                                   |               |   |            |    |    |    |    |   |   |   |   |   |   |    |    |    |    |
|-----------------------------------|---------------|---|------------|----|----|----|----|---|---|---|---|---|---|----|----|----|----|
| <i>Calumma oshaughnessyi</i>      | ZSM 1047/2003 | f | left side  | 7  | 8  | 8  | 0  | 7 | 6 | 0 | 0 | 0 | 0 | 14 | 53 | 0  | 0  |
|                                   |               |   | right side | 7  | 6  | 8  | 0  | 7 | 8 | 0 | 0 | 0 | 0 | 0  | 13 | 56 | 0  |
| <i>Calumma p. parsoni</i>         | ZSM 151/2016  | m | left side  | 9  | 8  | 7  | 0  | 7 | 1 | 0 | 0 | 0 | 0 | 12 | 39 | 0  | 70 |
|                                   |               |   | right side | 8  | 2  | 6  | 0  | 6 | 1 | 0 | 0 | 0 | 0 | 5  | 33 | 0  | 0  |
| <i>Calumma parsonii cristifer</i> | ZSM 664/2014  | f | left side  | 4  | 6  | 11 | 0  | 8 | 5 | 0 | 0 | 0 | 0 | 15 | 41 | 0  | 76 |
|                                   |               |   | right side | 3  | 8  | 8  | 0  | 7 | 5 | 0 | 0 | 0 | 0 | 17 | 42 | 0  | 0  |
| <b>others</b>                     |               |   |            |    |    |    |    |   |   |   |   |   |   |    |    |    |    |
| <i>Calumma cucullatum</i>         | ZSM 655/2014  | m | left side  | 6  | 9  | 9  | 11 | 6 | 0 | 0 | 7 | 2 | 5 | 0  | 0  | 0  | 60 |
|                                   |               |   | right side | 5  | 10 | 8  | 8  | 8 | 0 | 0 | 5 | 2 | 5 | 0  | 0  | 0  | 0  |
| <i>Calumma cucullatum</i>         | ZSM 653/2014  | f | left side  | 2  | 5  | 8  | 4  | 7 | 0 | 0 | 4 | 1 | 4 | 4  | 0  | 0  | 25 |
|                                   |               |   | right side | 3  | 4  | 8  | 3  | 7 | 0 | 0 | 4 | 1 | 3 | 4  | 0  | 0  | 0  |
| <i>Calumma cucullatum</i>         | ZSM 654/2014  | f | left side  | 2  | 4  | 7  | 4  | 6 | 0 | 0 | 3 | 1 | 3 | 5  | 0  | 0  | 30 |
|                                   |               |   | right side | 2  | 4  | 7  | 3  | 7 | 0 | 0 | 6 | 1 | 4 | 4  | 0  | 0  | 0  |
| <i>Calumma malthe</i>             | ZSM 71/2005   | m | left side  | 0  | 1  | 6  | 0  | 7 | 0 | 0 | 0 | 0 | 0 | 4  | 8  | 4  | 10 |
|                                   |               |   | right side | 0  | 0  | 7  | 0  | 7 | 0 | 0 | 0 | 0 | 0 | 3  | 6  | 0  | 0  |
| <i>Calumma malthe</i>             | ZSM 512/2014  | m | left side  | 7  | 5  | 13 | 0  | 7 | 0 | 0 | 0 | 0 | 0 | 5  | 36 | 5  | 24 |
|                                   |               |   | right side | 8  | 6  | 9  | 0  | 7 | 0 | 0 | 0 | 0 | 0 | 5  | 35 | 0  | 0  |
| <i>Calumma malthe</i>             | ZSM 513/2014  | m | left side  | 4  | 6  | 9  | 0  | 7 | 0 | 0 | 0 | 0 | 0 | 5  | 23 | 5  | 14 |
|                                   |               |   | right side | 7  | 4  | 8  | 0  | 4 | 0 | 0 | 0 | 0 | 0 | 4  | 19 | 0  | 0  |
| <i>Calumma malthe</i>             | ZSM 515/2014  | m | left side  | 13 | 7  | 9  | 0  | 7 | 0 | 0 | 0 | 0 | 0 | 9  | 16 | 8  | 13 |
|                                   |               |   | right side | 15 | 9  | 12 | 0  | 6 | 0 | 0 | 0 | 0 | 0 | 16 | 18 | 0  | 0  |
| <i>Calumma malthe</i>             | ZSM 516/2014  | m | left side  | 7  | 7  | 8  | 0  | 7 | 2 | 0 | 0 | 0 | 0 | 13 | 24 | 7  | 25 |
|                                   |               |   | right side | 5  | 6  | 8  | 0  | 5 | 1 | 0 | 0 | 0 | 0 | 8  | 21 | 0  | 0  |
| <i>Calumma malthe</i>             | ZSM 1704/2012 | m | left side  | 14 | 7  | 11 | 0  | 9 | 4 | 0 | 0 | 0 | 0 | 15 | 39 | 8  | 40 |
|                                   |               |   | right side | 13 | 10 | 12 | 0  | 9 | 2 | 0 | 0 | 0 | 0 | 16 | 40 | 0  | 0  |
| <i>Calumma malthe</i>             | ZSM 1705/2012 | f | left side  | 6  | 6  | 12 | 0  | 9 | 4 | 0 | 0 | 0 | 0 | 14 | 58 | 8  | 50 |
|                                   |               |   | right side | 7  | 8  | 9  | 0  | 7 | 3 | 0 | 0 | 0 | 0 | 12 | 40 | 0  | 0  |
| <i>Calumma malthe</i>             | ZSM 1833/2010 | f | left side  | 2  | 6  | 9  | 0  | 6 | 0 | 0 | 0 | 0 | 0 | 7  | 16 | 3  | 0  |
|                                   |               |   | right side | 2  | 6  | 9  | 0  | 4 | 0 | 0 | 0 | 0 | 0 | 3  | 12 | 0  | 0  |
| <i>Calumma malthe</i>             | ZSM 514/2014  | f | left side  | 0  | 0  | 4  | 0  | 6 | 0 | 0 | 0 | 0 | 0 | 6  | 4  | 5  | 7  |
|                                   |               |   | right side | 0  | 0  | 4  | 0  | 7 | 0 | 0 | 0 | 0 | 0 | 6  | 5  | 0  | 0  |



**Table S5.** Number of FTs per cranial bone from lateral view of 25 adult males of different *Calumma* species. See ‘Methods’ for abbreviations.

| species                                | collection number | sex | M  | PRF | Flat | POF | JU | SQ | Summe lat. | Pdors | Fdors |
|----------------------------------------|-------------------|-----|----|-----|------|-----|----|----|------------|-------|-------|
| <b><i>Calumma brevicorne</i> group</b> |                   |     |    |     |      |     |    |    |            |       |       |
| <i>Calumma amber</i>                   | ZSM 1041/2003     | m   | 0  | 3   | 0    | 16  | 5  | 15 | 39         | 20    | 0     |
| <i>Calumma brevicorne</i>              | ZSM 549/2001      | m   | 0  | 4   | 0    | 15  | 4  | 11 | 34         | 17    | 0     |
| <i>Calumma crypticum</i>               | ZSM 455/2010      | m   | 0  | 8   | 0    | 27  | 11 | 15 | 61         | 25    | 0     |
| <i>Calumma hafahafa</i>                | ZSM 617/2009      | m   | 0  | 6   | 0    | 17  | 6  | 15 | 44         | 15    | 8     |
| <i>Calumma peltierorum</i>             | ZSM 1725/2010     | m   | 3  | 7   | 0    | 11  | 9  | 14 | 44         | 23    | 34    |
| <b><i>Calumma furcifer</i> group</b>   |                   |     |    |     |      |     |    |    |            |       |       |
| <i>Calumma andringitraense</i>         | ZSM 129/2005      | m   | 0  | 2   | 0    | 11  | 9  | 0  | 22         | 0     | 0     |
| <i>Calumma furcifer</i>                | ZSM 225/2002      | m   | 0  | 2   | 0    | 9   | 5  | 5  | 21         | 0     | 0     |
| <i>Calumma gastrotaenia</i>            | ZSM 226/2002      | m   | 0  | 2   | 2    | 13  | 6  | 0  | 23         | 0     | 0     |
| <i>Calumma glawi</i>                   | ZSM 2042/2008     | m   | 0  | 3   | 3    | 15  | 6  | 6  | 33         | 10    | 0     |
| <i>Calumma guillaumeti</i>             | ZSM 440/2005      | m   | 0  | 6   | 0    | 21  | 7  | 4  | 38         | 20    | 20    |
| <i>Calumma tarzan</i>                  | ZSM 219/2010      | m   | 0  | 4   | 0    | 20  | 6  | 0  | 30         | 8     | 0     |
| <i>Calumma vencesi</i>                 | ZSM 50/2011       | m   | 0  | 4   | 4    | 12  | 7  | 6  | 33         | 30    | 30    |
| <b><i>Calumma nasutum</i> group</b>    |                   |     |    |     |      |     |    |    |            |       |       |
| <i>Calumma boettgeri</i>               | ZSM 440/2000      | m   | 0  | 2   | 1    | 7   | 7  | 3  | 20         | 0     | 0     |
| <i>Calumma linotum</i>                 | ZSM 2072/2007     | m   | 0  | 2   | 0    | 8   | 6  | 7  | 23         | 8     | 4     |
| <i>Calumma guibei</i>                  | ZSM 2855/2010     | m   | 0  | 2   | 4    | 12  | 4  | 6  | 28         | 14    | 0     |
| <i>Calumma gehringi</i>                | ZSM 2851/2010     | m   | 0  | 6   | 1    | 12  | 5  | 6  | 30         | 0     | 0     |
| <i>Calumma fallax</i>                  | ZSM 693/2009      | m   | 0  | 0   | 0    | 6   | 5  | 3  | 14         | 0     | 0     |
| <i>Calumma nasutum</i>                 | ZSM 618/ 2009     | m   | 0  | 2   | 2    | 11  | 4  | 4  | 23         | 0     | 0     |
| <i>Calumma vohibola</i>                | ZSM 645/2009      | m   | 0  | 0   | 0    | 9   | 4  | 5  | 18         | 0     | 0     |
| <i>Calumma vatosoa</i>                 | MRSN R1628        | m   | 1  | 4   | 0    | 17  | 9  | 12 | 43         | 0     | 0     |
| <b><i>Calumma parsonii</i> group</b>   |                   |     |    |     |      |     |    |    |            |       |       |
| <i>Calumma ambreense</i>               | ZSM 1042/2003     | m   | 5  | 8   | 0    | 36  | 12 | 25 | 86         | 40    | 60    |
| <i>Calumma oshaughnessyi</i>           | 1836/2010         | m   | 10 | 13  | 0    | 38  | 14 | 47 | 122        | 40    | 60    |
| <i>Calumma globifer</i>                | ZSM 141/2016      | m   | 0  | 15  | 0    | 55  | 13 | 57 | 140        | 40    | 70    |
| <b>others</b>                          |                   |     |    |     |      |     |    |    |            |       |       |
| <i>Calumma cucullatum</i>              | ZSM 655/2014      | m   | 2  | 16  | 0    | 23  | 5  | 9  | 55         | 20    | 40    |
| <i>Calumma malthe</i>                  | ZSM 71/2005       | m   | 0  | 3   | 0    | 13  | 6  | 4  | 26         | 14    | 0     |

**Table S6.** Presence (+) or absence (–) of fluorescence in chameleon genera checked with exemplarily specimens.

| genus              | species                        | collection number | sex    | fluorescence |
|--------------------|--------------------------------|-------------------|--------|--------------|
| <b>Archaius</b>    |                                |                   |        | +            |
|                    | <i>Archaius tigris</i>         | ZSM 600/2009      | male   | +            |
| <b>Bradypodion</b> |                                |                   |        | +            |
|                    | <i>Bradypodion thamnobates</i> | ZSM 4742/2012     | male   | +            |
|                    | <i>Bradypodion damaranum</i>   | ZSM 791/2000      | male   | +            |
|                    | <i>Bradypodion thamnobates</i> | ZSM 795/2000      | male   |              |
| <b>Brookesia</b>   |                                |                   |        | +            |
|                    | <i>Brookesia ambreensis</i>    | ZSM 2090/2007     | male   | +            |
|                    | <i>Brookesia antakarana</i>    | ZSM 1661/2012     | male   | +            |
|                    | <i>Brookesia betschi</i>       | ZSM 435/2016      | male   | +            |
|                    | <i>Brookesia brunoi</i>        | ZSM 888/2010      | male   | +            |
|                    | <i>Brookesia brygooi</i>       | ZSM 80/2006       | -      | +            |
|                    | <i>Brookesia decaryi</i>       | ZSM 911/2006      | -      | +            |
|                    | <i>Brookesia desperata</i>     | ZSM 3276/2012     | -      | -            |
|                    | <i>Brookesia ebenau</i>        | ZSM 87/2015       | -      | +            |
|                    | <i>Brookesia exarmata</i>      | ZSM 72/2006       | female | -            |
|                    | <i>Brookesia griveaudi</i>     | ZSM 1677/2012     | male   | +            |
|                    | <i>Brookesia karchei</i>       | ZSM 1659/2012     | female | +            |
|                    | <i>Brookesia lineata</i>       | ZSM 27/2016       | male   | +            |
|                    | <i>Brookesia minima</i>        | ZSM 990/2003      | male   | -            |
|                    | <i>Brookesia perarmata</i>     | ZSM 17/2006       | male   | -            |
|                    | <i>Brookesia peyrierasi</i>    | ZSM 252/2016      | female | -            |
|                    | <i>Brookesia ramanantsoai</i>  | ZSM 132/2016      | male   | -            |
|                    | <i>Brookesia stumpffi</i>      | ZSM 1681/2012     | male   | +            |
|                    | <i>Brookesia superciliaris</i> | ZSM 253/2016      | male   | +            |
|                    | <i>Brookesia thieli</i>        | ZSM 1674/2012     | female | +            |
|                    | <i>Brookesia tuberculata</i>   | ZSM 792/2009      | male   | -            |
|                    | <i>Brookesia vadoni</i>        | ZSM 440/2016      | male   | +            |
| <b>Chamaeleo</b>   |                                |                   |        | -            |
|                    | <i>Chamaeleo calytratus</i>    | ZSM 464/1998      | male   | -            |
|                    | <i>Chamaeleo chamaeleon</i>    | ZSM 935/2014      | male   | -            |
|                    | <i>Chamaeleo dilepis</i>       | ZSM 4347/2012     | -      | -            |
|                    | <i>Chamaeleo laevigatus</i>    | ZSM 56/1978       | -      | -            |
|                    | <i>Chamaeleo monachus</i>      | ZSM 13/1920       | -      | -            |
|                    | <i>Chamaeleo namaquensis</i>   | ZSM 96/1989/2     | -      | -            |
|                    | <i>Chamaeleo senegalensis</i>  | ZSM 4712/2012     | -      | -            |
| <b>Furcifer</b>    |                                |                   |        | +            |
|                    | <i>Furcifer angeli</i>         | ZSM 1057/2003     | male   | +            |
|                    | <i>Furcifer antimena</i>       | ZSM 624/2000      | female | -            |
|                    | <i>Furcifer antimena</i>       | ZSM 625/2000      | male   | -            |
|                    | <i>Furcifer antimena</i>       | ZSM 780/2000      | male   | -            |
|                    | <i>Furcifer antimena</i>       | ZSM 4381/2012     | female | -            |
|                    | <i>Furcifer antimena</i>       | ZSM 4382/2012     | female | -            |
|                    | <i>Furcifer balteatus</i>      | ZSM 682/2003      | male   | -            |
|                    | <i>Furcifer balteatus</i>      | ZSM 795/2003      | -      | -            |
|                    | <i>Furcifer bifidus</i>        | ZSM 157/2016      | female | -            |
|                    | <i>Furcifer campani</i>        | ZSM 537/2001      | male   | -            |
|                    | <i>Furcifer campani</i>        | ZSM 538/2001      | -      | -            |
|                    | <i>Furcifer campani</i>        | ZSM 539/2001      | -      | -            |
|                    | <i>Furcifer campani</i>        | ZSM 1058/2003     | female | -            |
|                    | <i>Furcifer campani</i>        | ZSM 1059/2003     | male   | +            |
|                    | <i>Furcifer campani</i>        | ZSM 72/2005       | male   | -            |
|                    | <i>Furcifer campani</i>        | ZSM 316/2006      | male   | +            |
|                    | <i>Furcifer campani</i>        | ZSM 317/2006      | male   | -            |

|                              |               |        |   |
|------------------------------|---------------|--------|---|
| <i>Furcifer campani</i>      | ZSM 723/2014  | female | + |
| <i>Furcifer campani</i>      | ZSM 724/2014  | female | + |
| <i>Furcifer campani</i>      | ZSM 725/2014  | female | - |
| <i>Furcifer campani</i>      | ZSM 630/2003  | -      | - |
| <i>Furcifer cephalolepis</i> | ZSM 1686/2008 | male   | - |
| <i>Furcifer cephalolepis</i> | ZSM 701/2000  | male   | - |
| <i>Furcifer cephalolepis</i> | ZSM 702/2000  | female | - |
| <i>Furcifer cephalolepis</i> | ZSM 324/2002  | female | + |
| <i>Furcifer cephalolepis</i> | ZSM 325/2002  | female | + |
| <i>Furcifer cephalolepis</i> | ZSM 326/2002  | male   | + |
| <i>Furcifer cephalolepis</i> | ZSM 327/2002  | male   | + |
| <i>Furcifer cephalolepis</i> | ZSM 328/2002  | female | + |
| <i>Furcifer labordi</i>      | ZSM 875/2000  | male   | - |
| <i>Furcifer labordi</i>      | ZSM 782/2000  | male   | - |
| <i>Furcifer lateralis</i>    | ZSM 28/2004   | female | - |
| <i>Furcifer lateralis</i>    | ZSM 185/2004  | male   | - |
| <i>Furcifer lateralis</i>    | ZSM 2043/2008 | -      | - |
| <i>Furcifer lateralis</i>    | ZSM 836/2014  | male   | - |
| <i>Furcifer lateralis</i>    | ZSM 649/2000  | female | - |
| <i>Furcifer lateralis</i>    | ZSM 541/2001  | -      | - |
| <i>Furcifer lateralis</i>    | ZSM 542/2001  | -      | - |
| <i>Furcifer lateralis</i>    | ZSM 543/2001  | male   | - |
| <i>Furcifer lateralis</i>    | ZSM 636/2003  | male   | - |
| <i>Furcifer lateralis</i>    | ZSM 785/2003  | male   | - |
| <i>Furcifer lateralis</i>    | ZSM 786/2003  | female | - |
| <i>Furcifer lateralis</i>    | ZSM 783/2006  | male   | - |
| <i>Furcifer lateralis</i>    | ZSM 916/2006  | male   | - |
| <i>Furcifer lateralis</i>    | ZSM 917/2006  | female | - |
| <i>Furcifer lateralis</i>    | ZSM 68/2009   | -      | - |
| <i>Furcifer lateralis</i>    | ZSM 69/2009   | -      | - |
| <i>Furcifer lateralis</i>    | ZSM 726/2014  | male   | - |
| <i>Furcifer major</i>        | ZSM 224/2002  | female | - |
| <i>Furcifer major</i>        | ZSM 936/2003  | male   | - |
| <i>Furcifer major</i>        | ZSM 937/2003  | male   | - |
| <i>Furcifer major</i>        | ZSM 938/2003  | male   | - |
| <i>Furcifer major</i>        | ZSM 41/2004   | male   | - |
| <i>Furcifer major</i>        | ZSM 175/2004  | male   | - |
| <i>Furcifer major</i>        | ZSM 195/2004  | male   | - |
| <i>Furcifer major</i>        | ZSM 73/2005   | -      | - |
| <i>Furcifer major</i>        | ZSM 194/2004  | male   | - |
| <i>Furcifer major</i>        | ZSM 783/2000  | male   | - |
| <i>Furcifer minor</i>        | ZSM 784/2000  | male   | - |
| <i>Furcifer minor</i>        | ZSM 786/2000  | male   | - |
| <i>Furcifer minor</i>        | ZSM 787/2000  | female | - |
| <i>Furcifer minor</i>        | ZSM 536/2001  | male   | - |
| <i>Furcifer minor</i>        | ZSM 918/2006  | male   | - |
| <i>Furcifer minor</i>        | ZSM 919/2006  | female | - |
| <i>Furcifer minor</i>        | ZSM 920/2006  | female | - |
| <i>Furcifer nicosiai</i>     | ZSM 20/2006   | female | - |
| <i>Furcifer nicosiai</i>     | ZSM 51/2006   | female | - |
| <i>Furcifer nicosiai</i>     | ZSM 84/2006   | male   | - |
| <i>Furcifer oustaleti</i>    | ZSM 243/2004  | -      | - |
| <i>Furcifer oustaleti</i>    | ZSM 1/2006    | male   | - |
| <i>Furcifer oustaleti</i>    | ZSM 105/2006  | female | - |
| <i>Furcifer oustaleti</i>    | ZSM 58/2009   | female | - |
| <i>Furcifer oustaleti</i>    | ZSM 59/2009   | female | - |
| <i>Furcifer oustaleti</i>    | ZSM 60/2009   | female | - |
| <i>Furcifer oustaleti</i>    | ZSM 61/2009   | male   | - |
| <i>Furcifer oustaleti</i>    | ZSM 665/2014  | male   | - |
| <i>Furcifer oustaleti</i>    | ZSM 774/2000  | female | - |
| <i>Furcifer pardalis</i>     | ZSM 775/2000  | female | - |
| <i>Furcifer pardalis</i>     | ZSM 776/2000  | female | - |
| <i>Furcifer pardalis</i>     | ZSM 777/2000  | female | - |

|                              |               |        |   |
|------------------------------|---------------|--------|---|
| <i>Furcifer pardalis</i>     | ZSM 778/2000  | female | - |
| <i>Furcifer pardalis</i>     | ZSM 1060/2003 | female | - |
| <i>Furcifer pardalis</i>     | ZSM 1061/2003 | female | - |
| <i>Furcifer pardalis</i>     | ZSM 2210/2007 | female | - |
| <i>Furcifer pardalis</i>     | ZSM 62/2009   | -      | - |
| <i>Furcifer pardalis</i>     | ZSM 63/2009   | male   | - |
| <i>Furcifer pardalis</i>     | ZSM 64/2009   | -      | + |
| <i>Furcifer pardalis</i>     | ZSM 65/2009   | -      | - |
| <i>Furcifer pardalis</i>     | ZSM 1730/2010 | male   | - |
| <i>Furcifer pardalis</i>     | ZSM 4379/2012 | male   | + |
| <i>Furcifer pardalis</i>     | ZSM 4380/2012 | -      | + |
| <i>Furcifer pardalis</i>     | ZSM 4680/2012 | male   | + |
| <i>Furcifer pardalis</i>     | ZSM 316/2014  | -      | - |
| <i>Furcifer pardalis</i>     | ZSM 317/2014  | -      | - |
| <i>Furcifer pardalis</i>     | ZSM 318/2014  | -      | - |
| <i>Furcifer pardalis</i>     | ZSM 319/2014  | -      | - |
| <i>Furcifer pardalis</i>     | ZSM 320/2014  | -      | - |
| <i>Furcifer pardalis</i>     | ZSM 321/2014  | -      | - |
| <i>Furcifer pardalis</i>     | ZSM 322/2014  | male   | - |
| <i>Furcifer pardalis</i>     | ZSM 323/2014  | -      | - |
| <i>Furcifer pardalis</i>     | ZSM 324/2014  | -      | - |
| <i>Furcifer pardalis</i>     | ZSM 527/2014  | male   | + |
| <i>Furcifer pardalis</i>     | ZSM 1016/2000 | -      | - |
| <i>Furcifer pardalis</i>     | ZSM 1017/2000 | -      | - |
| <i>Furcifer petteri</i>      | ZSM 1001/2003 | female | - |
| <i>Furcifer petteri</i>      | ZSM 1002/2003 | male   | - |
| <i>Furcifer petteri</i>      | ZSM 254/2004  | male   | - |
| <i>Furcifer petteri</i>      | ZSM 258/2004  | female | - |
| <i>Furcifer petteri</i>      | ZSM 272/2004  | male   | - |
| <i>Furcifer petteri</i>      | ZSM 274/2004  | male   | - |
| <i>Furcifer petteri</i>      | ZSM 315/2004  | female | - |
| <i>Furcifer petteri</i>      | ZSM 2136/2007 | female | - |
| <i>Furcifer petteri</i>      | ZSM 2137/2007 | male   | - |
| <i>Furcifer petteri</i>      | ZSM 2141/2007 | male   | - |
| <i>Furcifer petteri</i>      | ZSM 2142/2007 | male   | - |
| <i>Furcifer petteri</i>      | ZSM 2160/2007 | female | - |
| <i>Furcifer petteri</i>      | ZSM 2161/2007 | male   | - |
| <i>Furcifer petteri</i>      | ZSM 2022/2008 | male   | - |
| <i>Furcifer petteri</i>      | ZSM 1706/2012 | male   | - |
| <i>Furcifer petteri</i>      | ZSM 521/2000  | female | - |
| <i>Furcifer petteri</i>      | ZSM 785/2000  | female | - |
| <i>Furcifer petteri</i>      | ZSM 789/2000  | male   | - |
| <i>Furcifer petteri</i>      | ZSM 790/2000  | female | - |
| <i>Furcifer petteri</i>      | ZSM 767/2003  | female | - |
| <i>Furcifer petteri</i>      | ZSM 859/2003  | male   | - |
| <i>Furcifer petteri</i>      | ZSM 727/2014  | male   | - |
| <i>Furcifer polleni</i>      | ZSM 37/2010   | male   | + |
| <i>Furcifer polleni</i>      | ZSM 666/2000  | male   | + |
| <i>Furcifer polleni</i>      | ZSM 667/2000  | female | + |
| <i>Furcifer rhinocerotus</i> | ZSM 329/2014  | -      | - |
| <i>Furcifer rhinocerotus</i> | ZSM 532/2001  | male   | - |
| <i>Furcifer rhinocerotus</i> | ZSM 533/2001  | male   | - |
| <i>Furcifer rhinocerotus</i> | ZSM 534/2001  | female | - |
| <i>Furcifer rhinocerotus</i> | ZSM 535/2001  | -      | - |
| <i>Furcifer rhinocerotus</i> | ZSM 787/2001  | -      | - |
| <i>Furcifer timoni</i>       | ZSM 255/2004  | female | - |
| <i>Furcifer timoni</i>       | ZSM 256/2004  | female | - |
| <i>Furcifer timoni</i>       | ZSM 2103/2007 | male   | + |
| <i>Furcifer timoni</i>       | ZSM 2023/2008 | female | - |
| <i>Furcifer verrucosus</i>   | ZSM 1063/2003 | female | - |
| <i>Furcifer verrucosus</i>   | ZSM 1064/2003 | male   | - |
| <i>Furcifer verrucosus</i>   | ZSM 1065/2003 | male   | - |
| <i>Furcifer verrucosus</i>   | ZSM 1066/2003 | male   | - |

|                            |               |        |   |
|----------------------------|---------------|--------|---|
| <i>Furcifer verrucosus</i> | ZSM 1067/2003 | male   | - |
| <i>Furcifer verrucosus</i> | ZSM 40/2004   | female | - |
| <i>Furcifer verrucosus</i> | ZSM 60/2004   | male   | - |
| <i>Furcifer verrucosus</i> | ZSM 61/2004   | male   | - |
| <i>Furcifer verrucosus</i> | ZSM 66/2009   | male   | - |
| <i>Furcifer verrucosus</i> | ZSM 67/2009   | female | - |
| <i>Furcifer verrucosus</i> | ZSM 328/2014  | male   | - |
| <i>Furcifer verrucosus</i> | ZSM 623/2000  | male   | - |
| <i>Furcifer verrucosus</i> | ZSM 779/2000  | -      | - |
| <i>Furcifer verrucosus</i> | ZSM 959/2003  | male   | - |
| <i>Furcifer viridis</i>    | ZSM 540/2001  | -      | - |
| <i>Furcifer viridis</i>    | ZSM 79/2006   | male   | - |
| <i>Furcifer viridis</i>    | ZSM 1729/2010 | female | - |
| <i>Furcifer viridis</i>    | ZSM 1838/2010 | male   | - |
| <i>Furcifer viridis</i>    | ZSM 525/2014  | female | - |
| <i>Furcifer viridis</i>    | ZSM 526/2014  | male   | - |
| <i>Furcifer viridis</i>    | ZSM 44/2016   | male   | - |
| <i>Furcifer willsii</i>    | ZSM 193/2004  | male   | - |
| <i>Furcifer willsii</i>    | ZSM 446/2005  | male   | - |
| <i>Furcifer willsii</i>    | ZSM 463/2010  | female | - |
| <i>Furcifer willsii</i>    | ZSM 835/2014  | male   | - |
| <i>Furcifer willsii</i>    | ZSM 45/2016   | female | - |

|                          |               |        |   |
|--------------------------|---------------|--------|---|
| <b>Palleon</b>           |               |        | + |
| <i>Palleon lolontany</i> | ZSM 1679/2012 | female | + |

|                                   |               |      |   |
|-----------------------------------|---------------|------|---|
| <b>Kinyongia</b>                  |               |      |   |
| <i>Kinyongia excubitor</i>        | ZSM 893/2000  | male | + |
| <i>Kinyongia matschiei</i>        | ZSM 4746/2012 | -    | - |
| <i>Kinyongia multituberculata</i> | ZSM 1/1920/1  | male | + |
| <i>Kinyongia tavetana</i>         | ZSM 4747/2012 | -    | + |
| <i>Kinyongia tenue</i>            | ZSM 22/1915   | -    | + |
| <i>Kinyongia vosseleri</i>        | ZSM 2871/2007 | male | + |
| <i>Kinyongia xenorhina</i>        | ZSM 4751/2012 | male | + |

|                    |                        |  |  |
|--------------------|------------------------|--|--|
| <b>Nadzikambia</b> | no specimens available |  |  |
|--------------------|------------------------|--|--|

|                               |               |        |   |
|-------------------------------|---------------|--------|---|
| <b>Rhampholeon</b>            |               |        | - |
| <i>Rhampholeon boulengeri</i> | ZSM 4373/2012 | male   | - |
| <i>Rhampholeon platyceps</i>  | ZSM 16/1932/1 | -      | - |
| <i>Rhampholeon spectrum</i>   | ZSM 858/2000  | female | - |

|                                 |              |   |   |
|---------------------------------|--------------|---|---|
| <b>Rieppeleon</b>               |              |   | - |
| <i>Rieppeleon brevicaudatus</i> | ZSM 859/2000 | - | - |
| <i>Rieppeleon kerstenii</i>     | ZSM 826/2000 | - | - |

|                               |               |        |   |
|-------------------------------|---------------|--------|---|
| <b>Trioceros</b>              |               |        |   |
| <i>Trioceros cristatus</i>    | ZSM 808/2000  | male   | - |
| <i>Trioceros deremensis</i>   | ZSM 671/1911  | male   | + |
| <i>Trioceros ellioti</i>      | ZSM 911/2000  | -      | - |
| <i>Trioceros fuelleborni</i>  | ZSM 4706/2012 | -      | - |
| <i>Trioceros hoehnelii</i>    | ZSM 907/2000  | -      | + |
| <i>Trioceros ituriensis</i>   | ZSM 893/2014  | -      | - |
| <i>Trioceros jacksonii</i>    | ZSM 839/2000  | female | + |
| <i>Trioceros melleri</i>      | ZSM 814/2000  | male   | - |
| <i>Trioceros montium</i>      | ZSM 827/2000  | male   | - |
| <i>Trioceros oweni</i>        | ZSM 4719/2012 | male   | - |
| <i>Trioceros quadricornis</i> | ZSM 933/2014  | -      | - |
| <i>Trioceros sternfeldi</i>   | ZSM 1766/2006 | -      | - |
| <i>Trioceros wiedersheimi</i> | ZSM 855/2000  | -      | + |

**Table S7.** Settings for micro-CT scans. Abbreviations: Diam, diamond target; Stand, standard (tungsten) target.

| specimen                                   | description    | kV  | mA | target | duration |
|--------------------------------------------|----------------|-----|----|--------|----------|
| <i>C. amber</i> ZSM 1041/2003              | complete body  | 130 | 60 | Diam   | 18 min   |
| <i>C. ambreense</i> ZSM 1042/2003          | complete body  | 130 | 50 | Diam   | 18 min   |
| <i>C. andrigitraense</i> ZSM 544/2001      | complete body  | 130 | 60 | Diam   | 18 min   |
| <i>C. andringitraense</i> ZSM 554/2001     | complete body  | 130 | 60 | Diam   | 18 min   |
| <i>C. boettgeri</i> ZSM 227/2002           | chameleon head | 130 | 80 | Stand  | 30 min   |
| <i>C. boettgeri</i> ZSM 272/2007           | chameleon head | 130 | 80 | Stand  | 30 min   |
| <i>C. boettgeri</i> ZSM 273/2007           | chameleon head | 130 | 80 | Stand  | 30 min   |
| <i>C. boettgeri</i> ZSM 36/1913            | complete body  | 130 | 60 | Diam   | 18 min   |
| <i>C. boettgeri</i> ZSM 440/2000           | chameleon head | 130 | 80 | Stand  | 30 min   |
| <i>C. boettgeri</i> ZSM 441/2000           | chameleon head | 130 | 80 | Stand  | 30 min   |
| <i>C. boettgeri</i> ZSM 444/2000           | chameleon head | 130 | 80 | Stand  | 30 min   |
| <i>C. boettgeri</i> ZSM 551/2001           | chameleon head | 130 | 80 | Stand  | 30 min   |
| <i>C. brevicorne</i> ZSM 549/2001          | complete body  | 130 | 50 | Diam   | 18 min   |
| <i>C. cf. fallax</i> ZSM 693/2009          | chameleon head | 130 | 80 | Stand  | 30 min   |
| <i>C. cf. gallus</i> ZSM 691/2009          | chameleon head | 130 | 80 | Stand  | 30 min   |
| <i>C. cf. linotum</i> ZSM 143/2016         | chameleon head | 130 | 80 | Diam   | 30 min   |
| <i>C. cf. vencesi</i> ZSM 620/2009         | complete body  | 130 | 50 | Diam   | 18 min   |
| <i>C. cf.andringitraense</i> ZSM 0129/2005 | complete body  | 130 | 60 | Diam   | 18 min   |
| <i>C. cf.marojenze</i> ZSM 462/2010        | complete body  | 130 | 50 | Diam   | 18 min   |
| <i>C. crypticum</i> ZSM 455/2010           | complete body  | 120 | 70 | Diam   | 18 min   |
| <i>C. cuculatum</i> ZSM 655/2014           | complete body  | 130 | 50 | Diam   | 18 min   |
| <i>C. fallax</i> MNHN 1899.317             | chameleon head | 131 | 80 | Diam   | 30 min   |
| <i>C. fallax</i> ZSM 268/2010              | complete body  | 130 | 60 | Diam   | 18 min   |
| <i>C. fallax</i> ZSM 685/2003              | complete body  | 130 | 60 | Diam   | 18 min   |
| <i>C. furcifer</i> ZSM 225/2002            | complete body  | 130 | 60 | Diam   | 18 min   |
| <i>C. gallus</i> ZSM 321/2000              | complete body  | 130 | 60 | Diam   | 18 min   |
| <i>C. gastrotaenia</i> ZSM 226/2002        | complete body  | 130 | 60 | Diam   | 18 min   |
| <i>C. gehringi</i> ZSM 2851/2010           | complete body  | 130 | 80 | Stand  | 30 min   |
| <i>C. glawi</i> ZSM 2042/2008              | complete body  | 131 | 60 | Diam   | 18 min   |
| <i>C. globifer</i> ZSM 141/2016            | chameleon head | 130 | 80 | Diam   | 30 min   |
| <i>C. globifer</i> ZSM 221/2002            | complete body  | 130 | 50 | Diam   | 18 min   |
| <i>C. globifer</i> ZSM 221/2002            | chameleon head | 130 | 60 | Diam   | 18 min   |
| <i>C. guibei</i> 2842/2010                 | chameleon head | 130 | 80 | Stand  | 30 min   |
| <i>C. guibei</i> ht SMF 50.354             | chameleon head | 130 | 80 | Stand  | 30 min   |
| <i>C. guibei</i> ZSM 1686/2012             | chameleon head | 130 | 80 | Stand  | 30 min   |
| <i>C. guibei</i> ZSM 1688/2012             | chameleon head | 130 | 80 | Stand  | 30 min   |
| <i>C. guibei</i> ZSM 2840/2010             | chameleon head | 130 | 80 | Stand  | 30 min   |
| <i>C. guibei</i> ZSM 2841/2010n            | chameleon head | 130 | 80 | Stand  | 30 min   |
| <i>C. guibei</i> ZSM 2849/2010             | chameleon head | 130 | 80 | Stand  | 30 min   |
| <i>C. guibei</i> ZSM 2855/2010             | chameleon head | 130 | 80 | Stand  | 30 min   |
| <i>C. guillaumeti</i> ZSM 440/2005         | complete body  | 130 | 50 | Diam   | 18 min   |
| <i>C. hafahafa</i> DRV 06282               | complete body  | 130 | 50 | Diam   | 18 min   |
| <i>C. hafahafa</i> ZSM 617/2009            | complete body  | 130 | 50 | Diam   | 18 min   |

|                                       |                |     |    |       |        |
|---------------------------------------|----------------|-----|----|-------|--------|
| <i>C. hilleniusi</i> ZSM 380/200      | complete body  | 130 | 60 | Diam  | 12 min |
| <i>C. linotum</i> ZSM 21/1923         | complete body  | 120 | 80 | Stand | 30 min |
| <i>C. malthe</i> ZSM 71/2005          | complete body  | 130 | 50 | Diam  | 18 min |
| <i>C. nasutum</i> ZSM 134/2005        | chameleon head | 130 | 80 | Stand | 30 min |
| <i>C. nasutum</i> ZSM 135/2005        | chameleon head | 130 | 80 | Stand | 30 min |
| <i>C. nasutum</i> ZSM 35/2016         | chameleon head | 130 | 80 | Diam  | 30 min |
| <i>C. nasutum</i> ZSM 441/2005        | chameleon head | 130 | 80 | Stand | 30 min |
| <i>C. nasutum</i> ZSM 443/2005        | complete body  | 130 | 50 | Diam  | 18 min |
| <i>C. nasutum</i> ZSM 553/2009        | chameleon head | 130 | 80 | Stand | 30 min |
| <i>C. nasutum</i> ZSM 618/2009        | chameleon head | 130 | 80 | Stand | 30 min |
| <i>C. nasutum</i> ZSM 619/2009        | chameleon head | 130 | 80 | Stand | 30 min |
| <i>C. nasutum</i> ZSM 735/2003        | chameleon head | 130 | 80 | Stand | 30 min |
| <i>C. nasutum</i> ZSM 924/2003        | chameleon head | 130 | 80 | Stand | 30 min |
| <i>C. oshaughnessyi</i> ZSM 1836/2010 | complete body  | 130 | 50 | Diam  | 18 min |
| <i>C. parsoni</i> ZSM 47/1990         | complete body  | 130 | 60 | Diam  | 36 min |
| <i>C. peltierorum</i> ZSM 1725/2010   | complete body  | 130 | 50 | Diam  | 18 min |
| <i>C. peyrieasi</i> ZSM 1727/2010     | complete body  | 130 | 50 | Diam  | 18 min |
| <i>C. radamanus</i> SMF 26394         | complete body  | 130 | 80 | Stand | 30 min |
| <i>C. tarzan</i> ZSM 219/2010         | complete body  | 120 | 80 | Diam  | 18 min |
| <i>C. tsaratanaense</i> ZSM 1728/2010 | complete body  | 130 | 50 | Diam  | 18 min |
| <i>C. vatosoa</i> MRSN R1628          | chameleon head | 130 | 80 | Stand | 30 min |
| <i>C. vatosoa</i> SMF 26357           | chameleon head | 130 | 80 | Stand | 30 min |
| <i>C. vencesi</i> ZSM 50/2011         | complete body  | 120 | 80 | Diam  | 21 min |
| <i>C. vencisi</i> ZSM 50/2011         | complete body  | 130 | 50 | Diam  | 51 min |
| <i>C. vohibola</i> ZSM 645/2009       | chameleon head | 130 | 80 | Stand | 30 min |
| <i>C. vohibola</i> ZSM 645/2009       | complete body  | 130 | 60 | Diam  | 18 min |
| <i>C. capuroni</i> ZSM 5104/2005      | complete body  | 130 | 60 | Diam  | 18 min |

**Table S8. Equipment and settings of microscopy photography**

|                          |                                                                                                                                                                                                                                                                                                                                                            |
|--------------------------|------------------------------------------------------------------------------------------------------------------------------------------------------------------------------------------------------------------------------------------------------------------------------------------------------------------------------------------------------------|
| Figs 2A,B                | Volume renderings based on light micrographs (see corresponding section in material and methods): original 8 bit grayscale, jpg, 1390 x 1065 px @ 1.28 $\mu\text{m}/\text{px}$ . Processed with Adobe® Photoshop® CS6: edge length downsampled to 96% $\rightarrow$ 1051 x 1045 px @ 1.33 $\mu\text{m}/\text{px}$ , converted to TIFF, 300 dpi.            |
| Figs 2C,D                | Light micrographs (10x): original 24 bit RGB, jpg, 2560 x 1920 px @ 342 nm/px. Processed with Adobe® Photoshop® CS6: edge length downsampled to 41%, height cropped from 788 to 710 px $\rightarrow$ 1051 x 710 px @ 834 nm/px, slight color correction (reduction of magenta), unsharp masked (radius 4px, strength 80%), converted to TIFF, 300 dpi.     |
| Figs 2E,F                | Light micrographs (40x): original 24 bit RGB, jpg, 1920 x 2560 px @ 85.2 nm/px. Processed with Adobe® Photoshop® CS6: edge length downsampled to 54.7%, height cropped from 1400 to 710 px $\rightarrow$ 1051 x 710 px @ 156 nm/px, slight color correction (reduction of magenta), unsharp masked (radius 4px, strength 80%), converted to TIFF, 300 dpi. |
| Supplementary Fig. S1A   | Light micrographs (10x): original 24 bit RGB, jpg, 2560 x 1920 px @ 342 nm/px. Processed with Adobe® Photoshop® CS6: edge length downsampled to 41%, height cropped from 788 to 728 px $\rightarrow$ 1051 x 728 px @ 834 nm/px, slight color correction (reduction of magenta), unsharp masked (radius 4px, strength 80%), converted to TIFF, 300 dpi.     |
| Supplementary Fig. S1B   | Light micrographs (60x): original 24 bit RGB, jpg, 2560 x 1920 px @ 56.6 nm/px. Processed with Adobe® Photoshop® CS6: edge length downsampled to 41%, height cropped from 788 to 728 px $\rightarrow$ 1051 x 728 px @ 138 nm/px, slight color correction (reduction of magenta), unsharp masked (radius 4px, strength 80%), converted to TIFF, 300 dpi.    |
| Supplementary Figs S1C–E | TEM photographs (4400x): original 1376 x 1032 @ 15.8 nm/px, 8 bit grayscale, TIFF. Processed with Adobe® Photoshop® CS6: region of interest 515 x 942 px cropped (after rotation if necessary), upscaled to 692 x 1266 px (i.e. 134.369%) to match print area, final resolution 11.76 nm/px, brightness and contrast adjusted, 300 dpi.                    |
